# Supplementary material
Source: PubMed Central journal article supplement (PMC8530981)
Supplement: NIHMS1734383-supplement-2.pdf [file NIHMS1734383-supplement-2.pdf]

## Combined Supplementary Materials

**Figure-S1, related to Figure 1**

Supplementary Figure-1

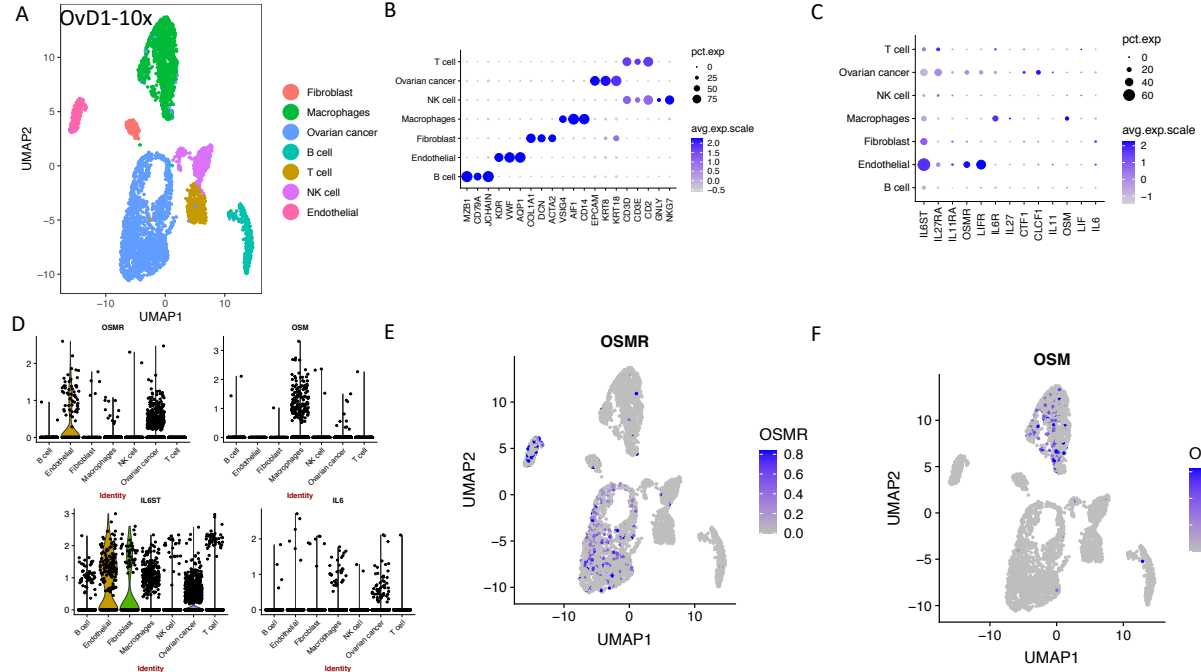

**Figure-S1. OvD1-10x scRNA-seq dataset. A**, UMAP plot of different cell types detected in the dataset. **B**, Dotplot of cell type marker expression in different cell types showing their average expression (color of dot) and percentage of cells with gene expression (size of dot). **C**, Dotplot of IL6 family receptors and ligands expression present in the dataset. **D**, Violin plots of selected receptors and ligands expression in each cell type. **E**, UMAP plot showing expression of OSMR in each cell in the dataset. **F**, UMAP plot showing expression of OSM in each cell in the dataset.

## Figure-S2, related to Figure 1

Supplementary Figure-2

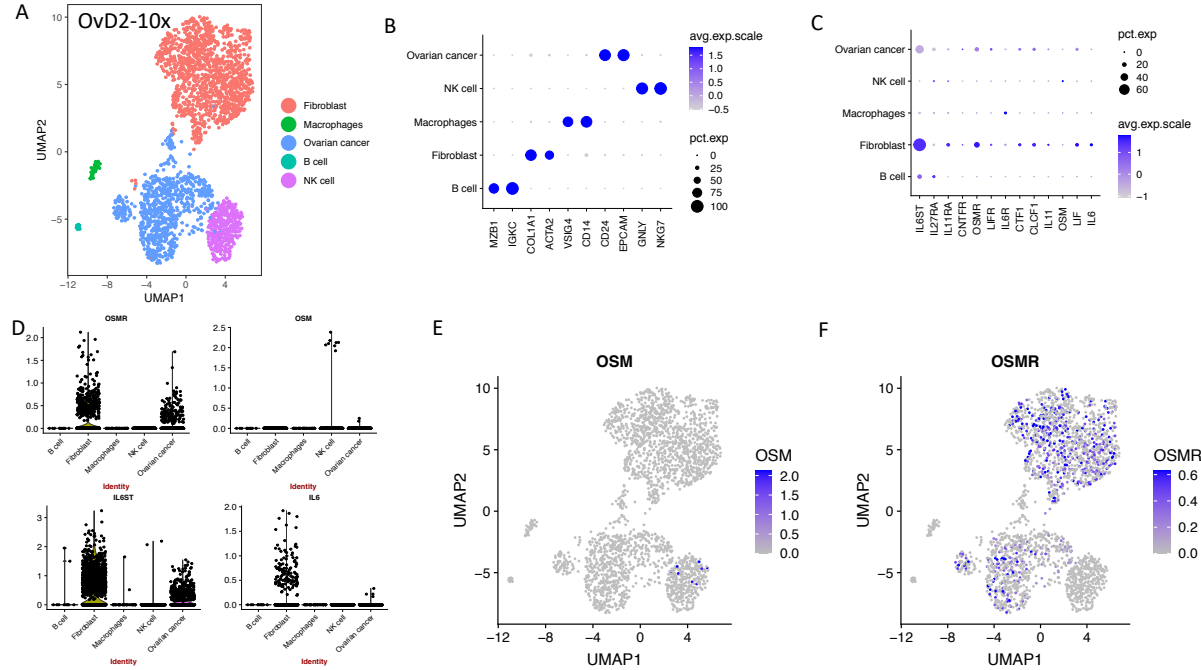

**Figure-S2. Ovd2-10x scRNA-seq dataset.** **A**, UMAP plot of different cell types detected in the dataset. **B**, Dotplot of cell type marker expression in different cell types showing their strength (color of dot) and prevalence (size of dot). **C**, Dotplot of IL6 family receptors and ligands expression present in the dataset. **D**, Violin plots of selected receptors and ligands expression in each cell type. **E**, UMAP plot showing expression of OSMR in each cell in the dataset. **F**, UMAP plot showing expression of OSM in each cell in the dataset.

## Figure-S3, related to Figure 1

Supplementary Figure-3

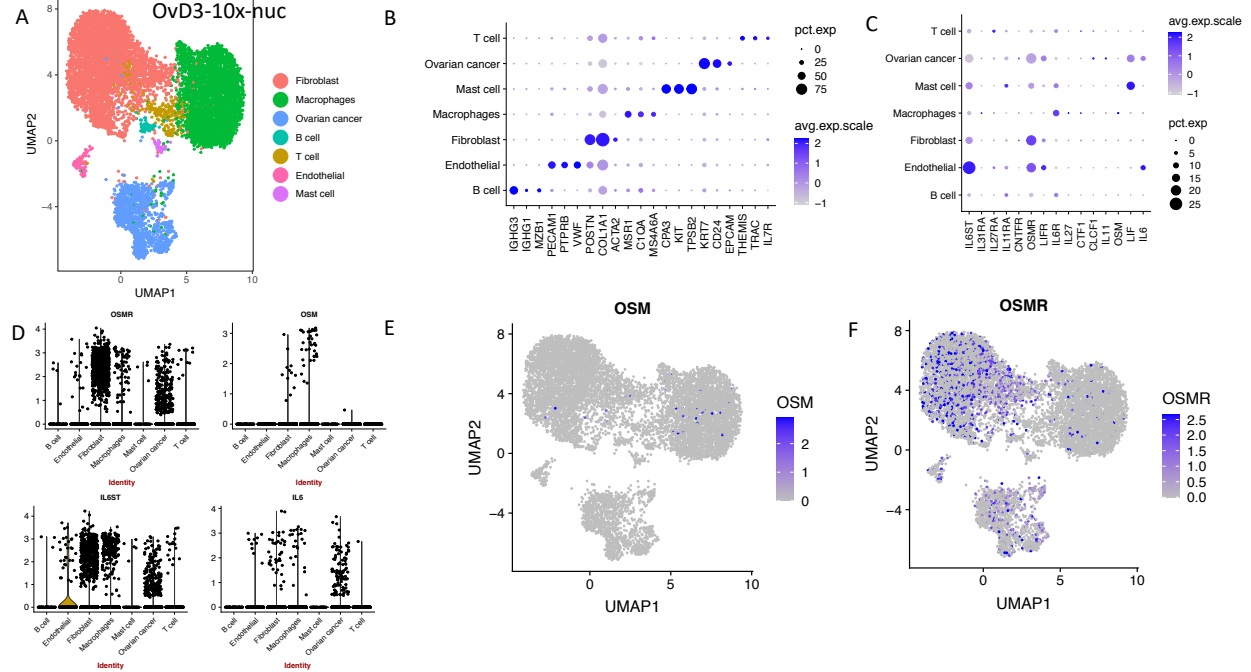

**Figure-S3. Ovd3-10x-nuc snRNA-seq dataset.** **A**, UMAP plot of different cell types detected in the dataset. **B**, Dotplot of cell type marker expression in the different cell types showing their strength (color of dot) and prevalence (size of dot). **C**, Dotplot of IL6 family receptors and ligands expression present in the dataset. **D**, Violin plots of selected receptors and ligands expression in each cell type. **E**, UMAP plot showing expression of OSMR in each cell in the dataset. **F**, UMAP plot showing expression of OSM in each cell in the dataset.

## Figure-S4, related to Figure 1

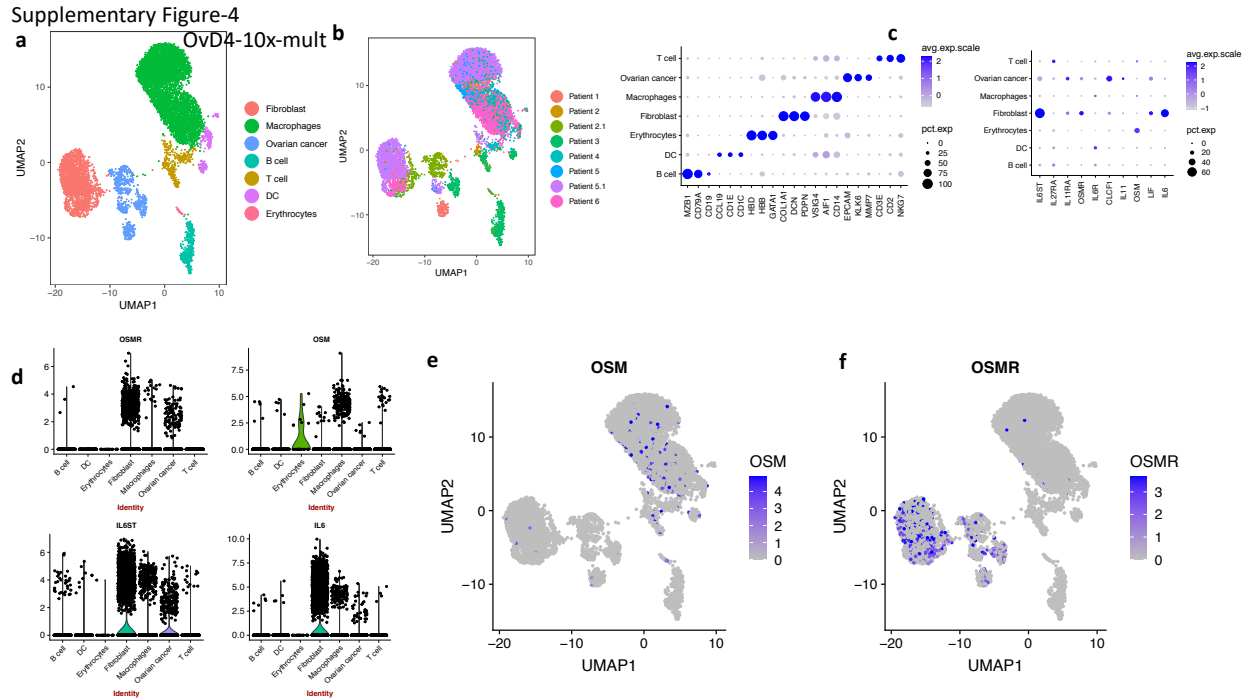

**Figure-S4. Ovd4-10x-mult multiple-patient scRNA-seq dataset. A,** UMAP plot of different cell types detected in dataset. **B,** Dotplot of cell type marker expression in the different cell types showing their strength (color of dot) and prevalence (size of dot). **C,** Dotplot of IL6 family receptors and ligands expression present in the dataset. **D,** Violin plots of selected receptors and ligands expression in each cell type. **E,** UMAP plot showing expression of OSMR in each cell in the dataset. **F,** UMAP plot showing expression of OSM in each cell in the dataset.

## Figure-S5, related to Figure 1

Supplementary Figure-5

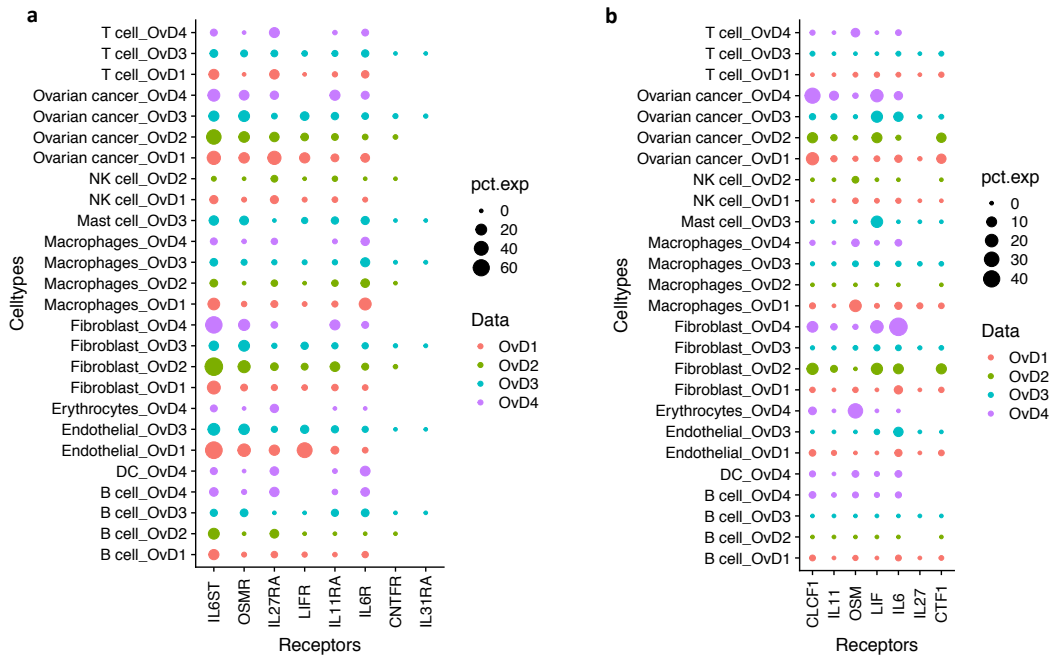

**Figure-S5; Related to Figure-1. A,** Dotplot showing the average expression of IL6 family receptors in each cell type in from each of the four datasets. Size of the dots show the percentage of cells in each cell type showing expression. Color of the dots show the datasets. **B,** Dotplot showing the expression of IL6 family ligands in each cell type in each of the four datasets. Size of the dots show the percentage of cells in each cell type showing expression. Color of the dots represent the datasets.

## Figure-S6, related to Figure 1

Supplementary Figure-6

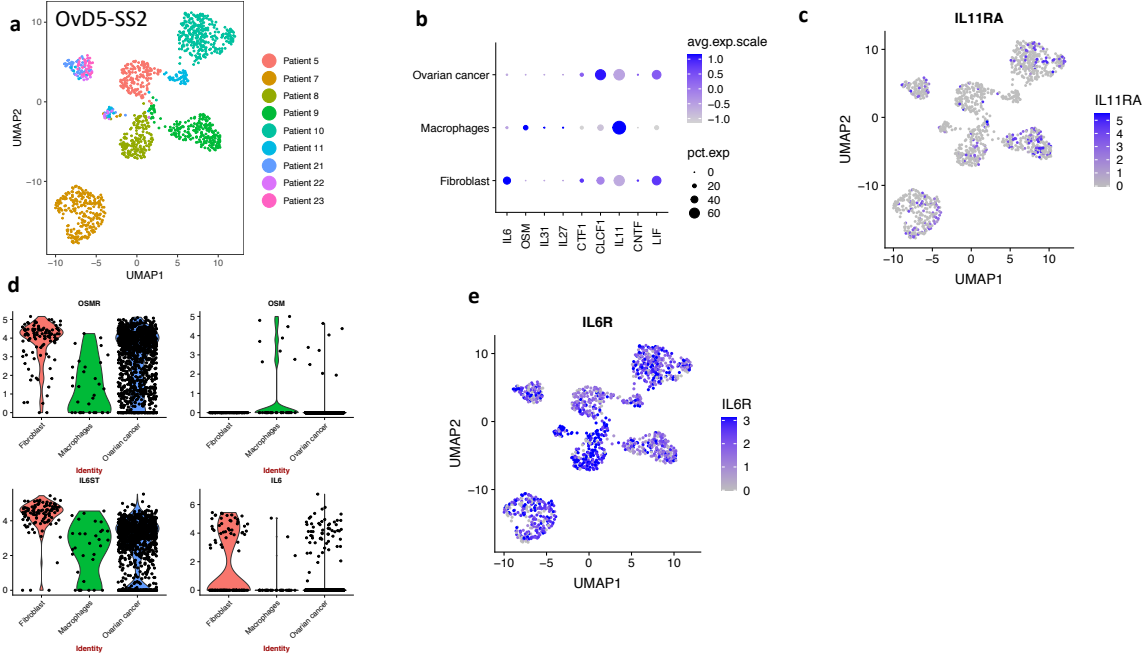

**Figure-S6. Ovd5-SS2 multiple-patient SS2 dataset. A**, UMAP plot of the cells colored based on different patients in the dataset. **B**, Dotplot of IL6 family receptors and ligands expression present in the dataset showing their strength (color of dot) and prevalence (size of dot). **C**, UMAP plot showing expression of IL11RA in each cell in the dataset. **D**, Violin plots of selected receptors and ligands expression in each cell type. **E**, UMAP plot showing expression of IL6R in each cell in the dataset.

Figure-S7, related to Figure 1 and 2.

Supplementary Fig 7

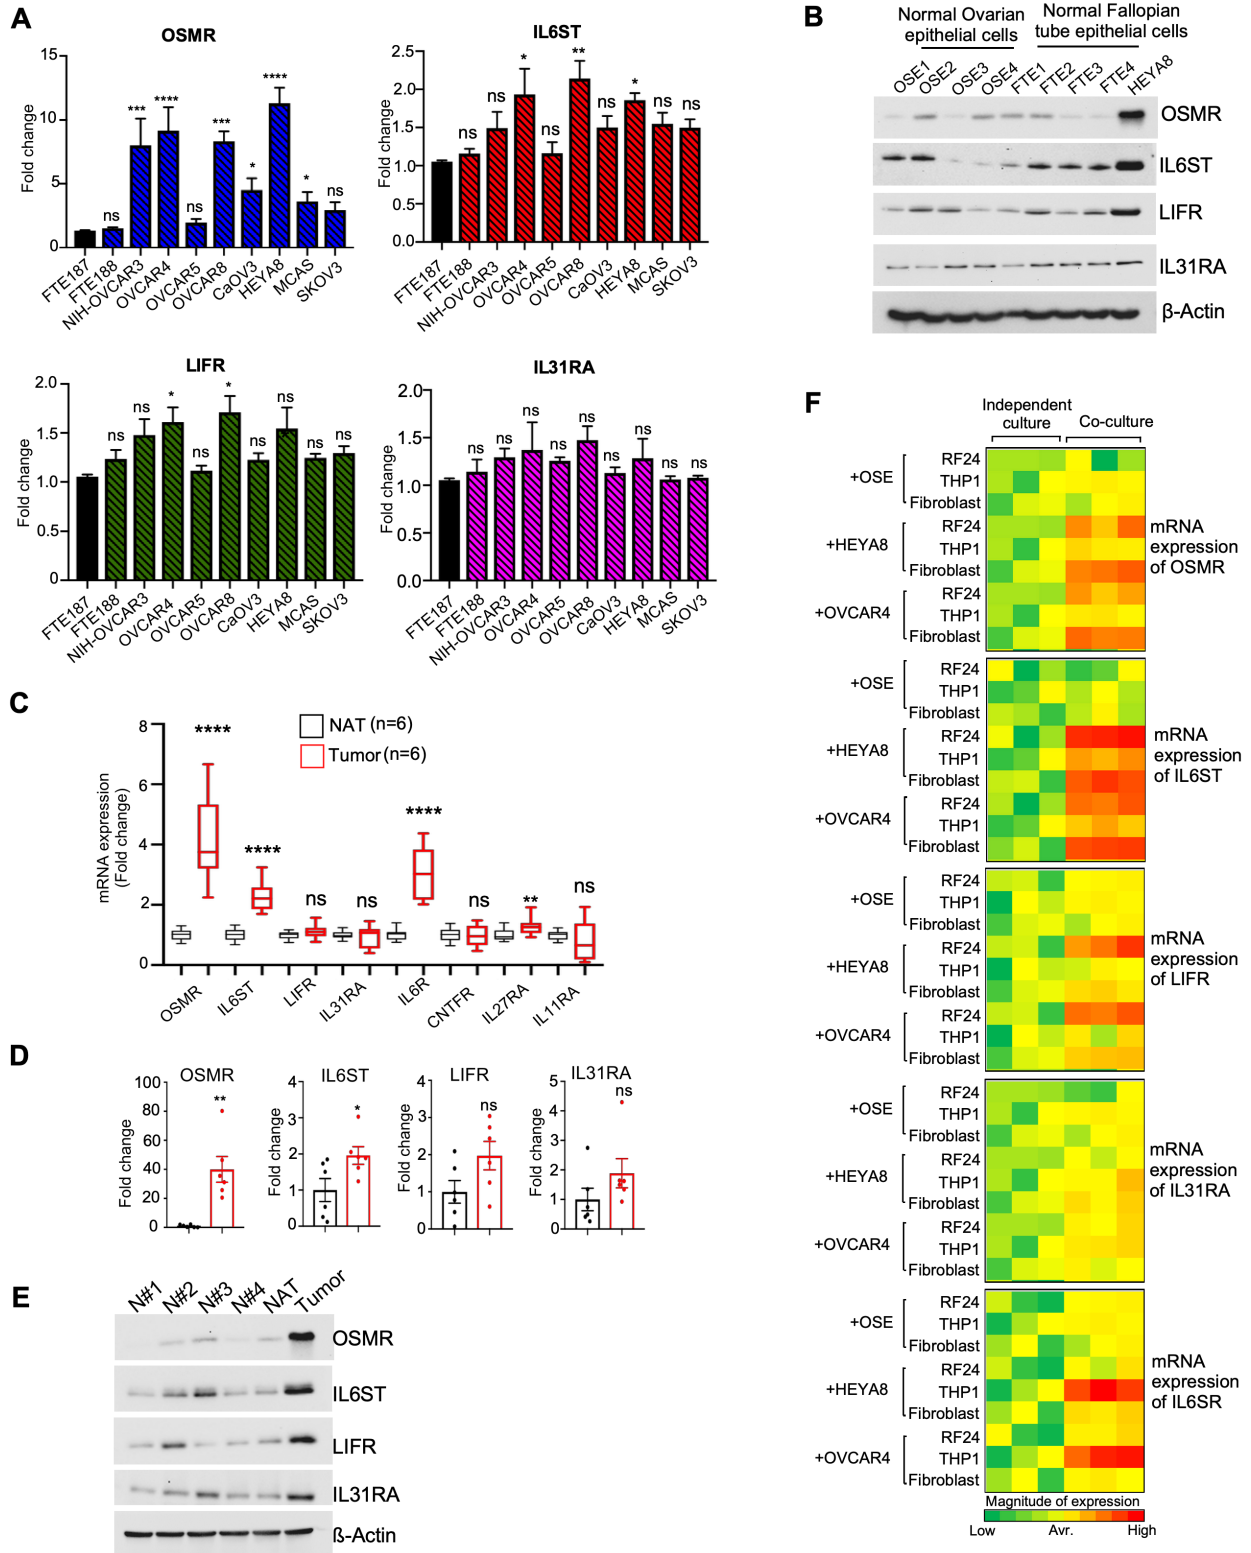

**Figure S7. OSMR is highly expressed in ovarian cancer cells and cancer tissues compared to normal cells and tissues.**

**A**, Total protein was isolated from different ovarian cancer cell lines and fallopian tube epithelial cells (FTE) and western blotting was performed. Histograms represent protein levels of the indicated proteins normalized to  $\beta$ -Actin and w.r.t FTE 187 cells from three independent experiments of Fig 2A. **B**, Total protein was isolated from 4 normal surface epithelial cells (OSE) and 4 fallopian tube epithelial cells (FTE) and western blotting was performed with the indicated antibodies. HEYA8 having high OSMR expression is used for comparison. **C**, qPCR showing mRNA expression of the indicated IL6 family receptors in ovarian tumor tissues and their matched normal adjacent ovarian tissues (NAT) from 6 patients (n=6). **D**, Total protein was isolated from 6 different normal adjacent ovarian tissues (NAT) and 6 tumor tissues and western blotting was performed. Histograms represent protein levels of the indicated proteins from 6 tissues in each group normalized to  $\beta$ -Actin and with respect to NAT as in Fig 2B. **E**, Cell lysates were prepared from normal ovarian tissues (N) (n=4), a representative of normal adjacent tissue (NAT) and tumor tissue were included for comparison and western blotting was performed with indicated antibodies. **F**, Heatmap shows mRNA expression of the indicated IL6 family receptors in fibroblasts (GM15859), macrophages (THP1) and endothelial cell (RF24) which were seeded in the bottom chamber of trans-well inserts, when cultured alone or co-cultured with ovarian surface epithelial cells (OSE), HEYA8 or OVCAR4. OSE, HEYA8 and OVCAR4 cells were seeded on the upper chamber of trans-wells of size 1  $\mu$ m. Total RNA was isolated from both the cultures and mRNA expression of indicated genes were determined with respect to  $\beta$ -Actin. Color codes at the bottom indicate the magnitude of gene expression. Data



represent means  $\pm$  SEM. Student's t test (two tailed, unpaired) was performed **in** A, C, and D respectively. \*\*\*\* $P \leq 0.0001$ , \*\*\* $P \leq 0.001$ , \*\* $P \leq 0.01$ , \* $P \leq 0.05$ , ns: not significant.

**Figure-S8, related to Figure 1**

**Supplementary Fig 8**

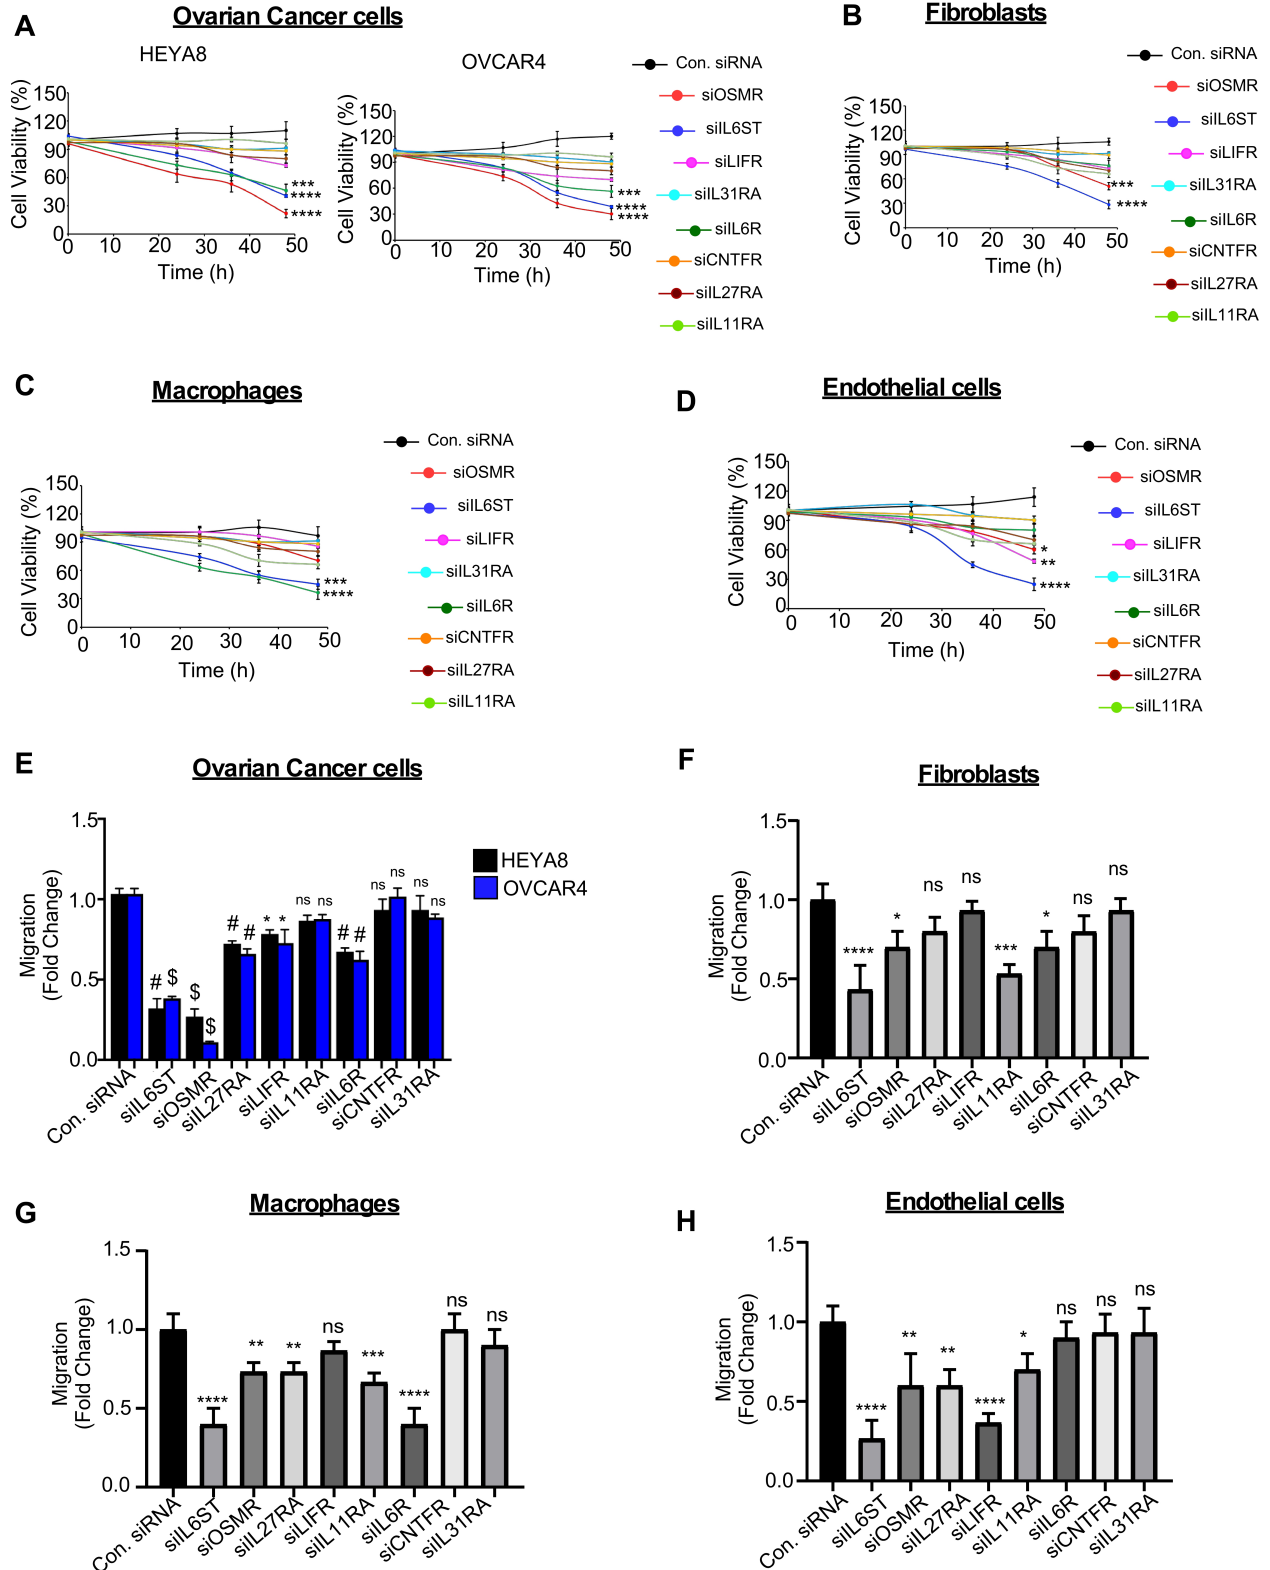

**Fig. S8. Knockdown of OSMR significantly inhibit the proliferation and migration of ovarian cancer cells and fibroblasts. A-D**, CCK8 assay demonstrating proliferation in ovarian cancer cells (HEYA8 and OVCAR4), fibroblasts, macrophages (THP1), and Endothelial cells (RF24). Cells were transfected with indicated siRNA of IL6 family receptors for 24h and CCK8 proliferation assay was performed at the indicated time points. **E-H** Trans-well migration assay in ovarian cancer cells (HEYA8 and OVCAR4), Macrophages (THP1), Endothelial cells (RF24) and Fibroblasts cells. Cells were transfected with indicated siRNA of IL6 family receptors for 24h and migration assay was performed for 12h. Student's t test (two tailed, unpaired) was performed in **(A-H)** w.r.t control siRNA. Data represent means  $\pm$  SEM. \*\*\*\* $P \leq 0.0001$ , \*\*\* $P \leq 0.001$ , \*\* $P \leq 0.01$ , \* $P \leq 0.05$ , # $P \leq 0.001$ , \$ $P \leq 0.0001$ , ns: not significant.

## Figure-S9, related to Figure 2

### Supplementary Fig 9

**A**

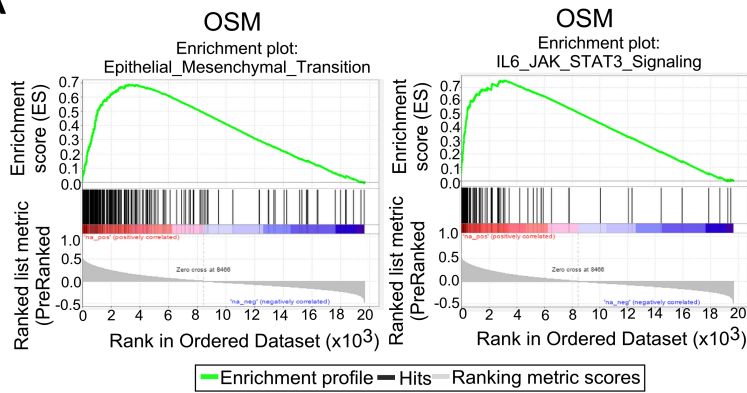

**B**

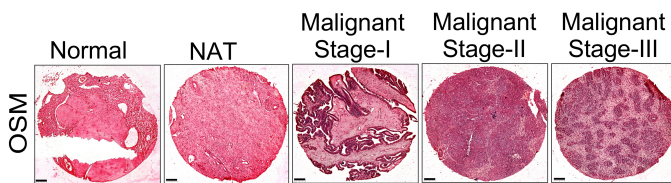

**C**

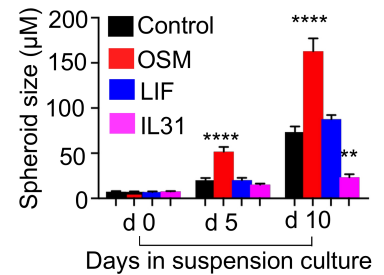

**Fig. S9. OSMR expression is associated with malignant characteristics in ovarian cancer. A**, GSEA analysis demonstrating the enrichment score of indicated functional annotation marks based on OSM expression in the TCGA ovarian cancer samples. ES: enrichment score, NES: normalized enrichment score. **B**, Representative images from ovarian cancer tissue microarray core showing OSM expression immunostained for OSM and scanned using Aperio Scan Scope (Aperio Technologies). Normal (N), Normal adjacent tumor (NAT), Malignant stage I, II and III are marked. Scale bar, 100  $\mu\text{m}$ . **C**, Histogram shows the relative size of spheroids as in (Fig-2I) at the indicated time points.

Student's t test and Dunnett's multiple comparison test were performed in (C). Data represent means  $\pm$  SEM. \*\*\*\* $P \leq 0.0001$ , and \*\* $P \leq 0.01$

**Figure-S10, related to Figure 2**

**Supplementary Fig 10**

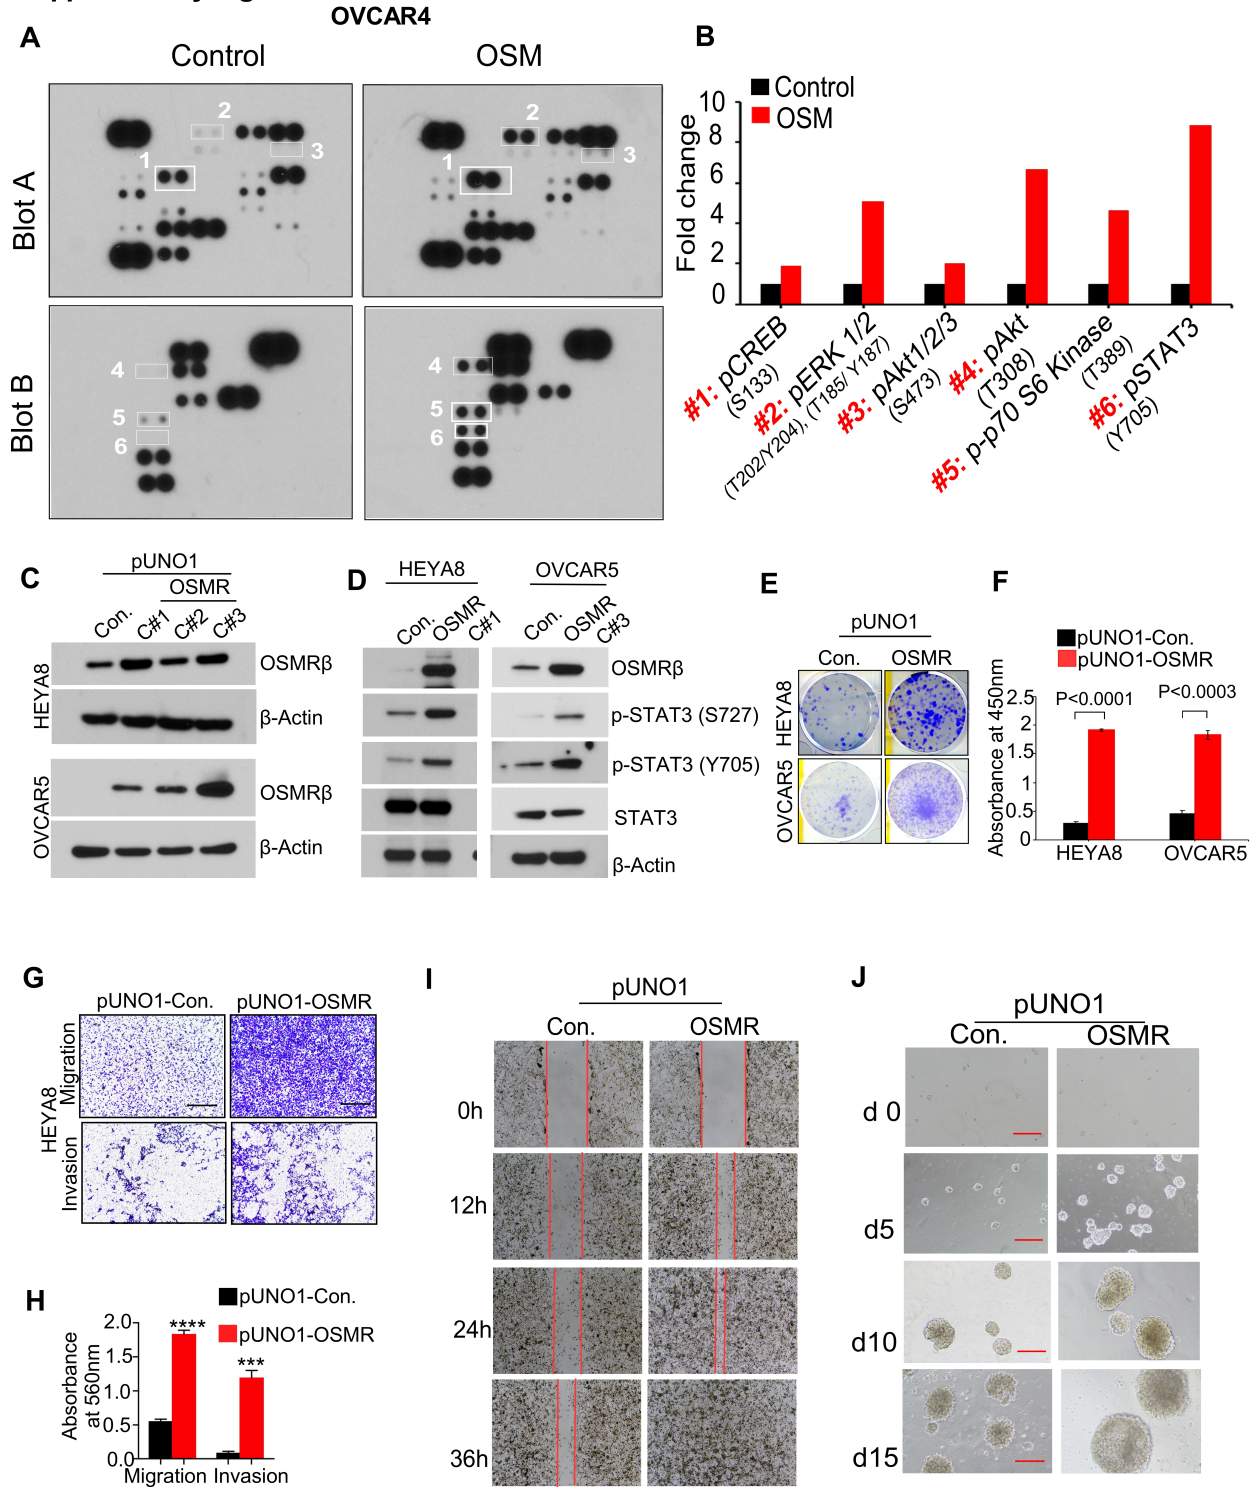

**Fig. S10. High OSMR expression promotes oncogenic signaling in ovarian cancer.**

**A**, OVCAR4 cells were stimulated with OSM for 24h and cell lysates were prepared, and the levels of phospho-kinase proteins were quantitated using Phospho-protein kinase array membrane. **B**, the histograms represent mean values of densitometry readings of the significantly altered Phospho-kinase proteins on the array membrane marked in white squares. **C**, HEYA8 and OVCAR5 cells were stably transfected with pUNO1-OSMR overexpression plasmid. C#1 to C#3 refers to different clones selected after stable transfection and western blot was performed for the indicated proteins. **D**, HEYA8 and OVCAR5 were stably transfected with clone #1 and clone#3 respectively and western blot was performed for the indicated proteins. **E**, HEYA8 and OVCAR5 cells were stably transfected with pUNO-1-OSMR overexpression plasmid and 1200 cells were seeded on 6 well plate for colony forming assay. Colonies were stained with 0.5% crystal violet and photographed on Day 10. **F**, Crystal violet-stained colonies were eluted in 10% acetic acid and quantitated. **G**, HEYA8 cells stably overexpressed with pUNO1-Control vector and clone #1 of pUNO1-OSMR were seeded for 12 h and 16h for migration and invasion respectively. Scale bar, 100  $\mu$ m. **H**, Crystal violet-stained migrated and invaded cells were eluted in 10% acetic acid and quantitated. **I**, Wound healing assay in HEYA8 stably overexpressed with pUNO1-Control vector and clone #1 of pUNO1-OSMR and photographed at indicated time points. **J**, Representative images of 3D spheroid formation assay. HEYA8 cells stably overexpressed with pUNO1-OSMR were cultured in Clona Cell media on low adherent plate and photographed at indicated days. Scale bar, 500  $\mu$ m. Student's t test (two tailed, unpaired) was performed in (**F**, **H**). Data represent means  $\pm$  SEM. \*\*\*\* $P \leq 0.0001$ , \*\*\* $P \leq 0.001$

**Figure-S11, related to Figure 3**

**Supplementary Figure 11**

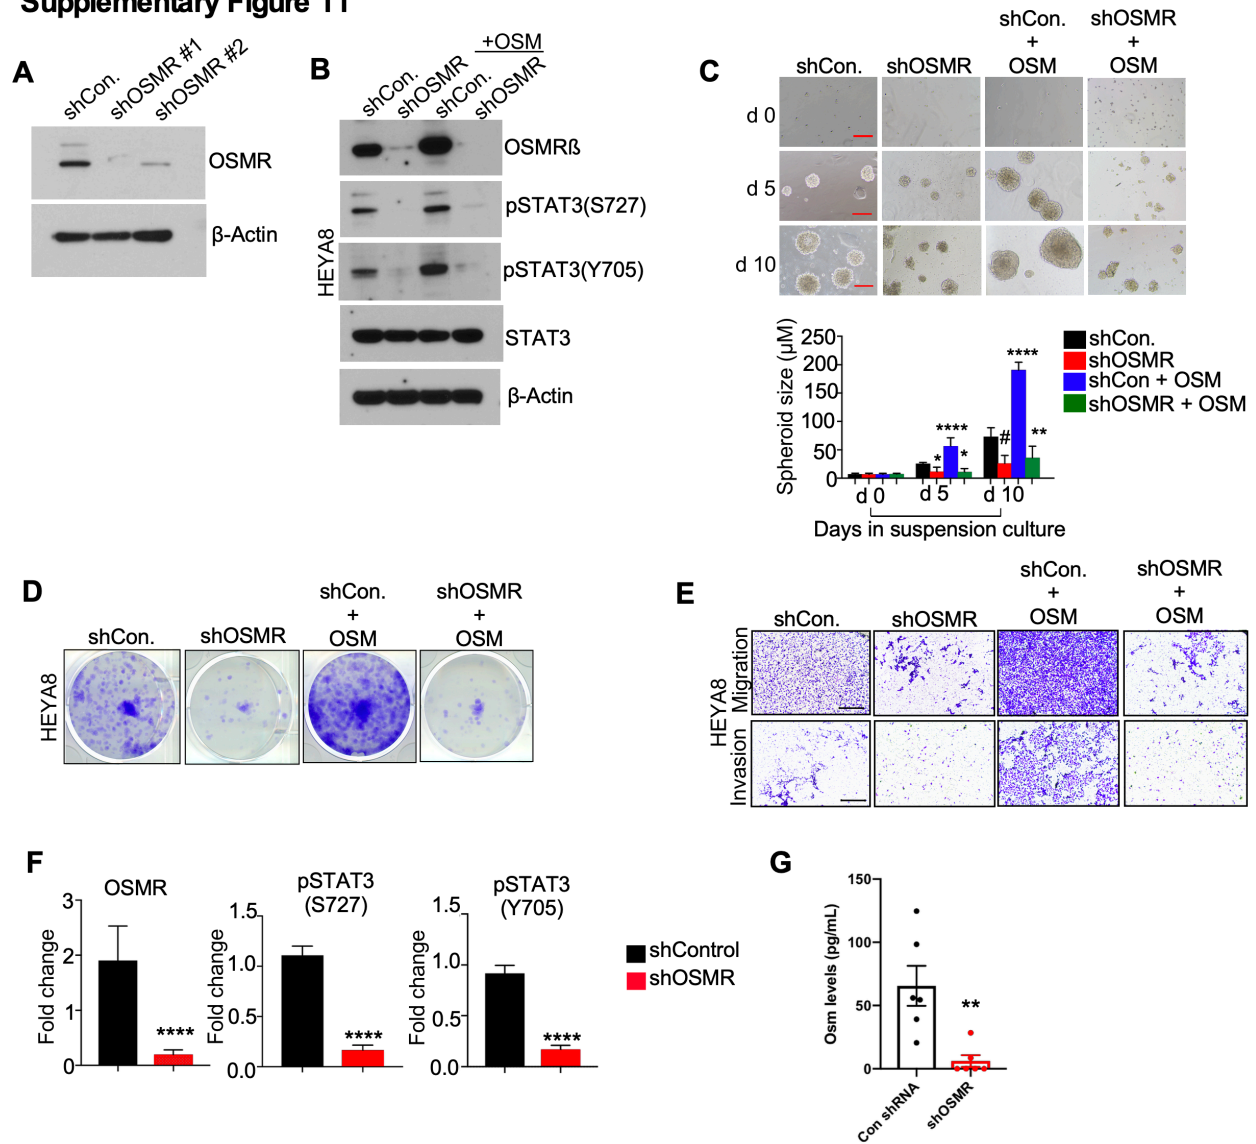

**Fig. S11. Knockdown of OSMR reduced ovarian cancer progression and abrogates**

**expression of downstream targets. A,** HEYA8 cells were stably transfected with two

non-overlapping shOSMR-lenti vectors, shOSMR #1 and shOSMR#2. Cells lysates were

prepared after 48h and western blotting was performed for the indicated proteins. **B,**

HEYA8 cells stably knocked of OSMR using shRNA or express con-shRNA were

stimulated with OSM (100ng/mL) for 48h. Cell lysates were then prepared, and western



blot was performed for the indicated proteins. **C**, Representative images of 3D spheroid formation assay. HEYA8 cells stably express shControl or shOSMR#1 were cultured in ClonaCell media on low adherent plate with or without OSM (100ng/mL) for the indicated time. Spheroids were photographed at indicated days. Scale bar, 500  $\mu$ m. Histogram represents size of spheroids from 4 different fields per group from Day 0 to Day 10 of spheroid culture. **D**, HEYA8 cells from C were treated with OSM for 14-days, then stained using crystal violet staining to visualize colonies. **E**, HEYA8 cells from C were stimulated with and without OSM for 12 h. Scale bar, 100  $\mu$ m. **F**, Histograms represent densitometric analysis of OSMR protein levels and STAT3 phosphorylation levels in tumor tissues collected from sh-control-HEYA8 and sh-OSMR-HEYA8 injected nude mice in **Fig. 3I**. Error bars indicate three representative tissues collected for Western blot. **G**, BR-Luc murine cell lines that were stably depleted for OSMR using shOSMR or the control cells were injected intraperitoneally in syngeneic FVB mice (n= 6/group). Ascites fluid was collected after 6-weeks of injection. Peritoneal wash was performed using 3 ml of PBS in the mice exhibit either low or no ascites, then OSM levels were determined by ELISA. Data represent the means  $\pm$  SEM of six mice from each group. Student's t test (two tailed, unpaired) was performed to determine P-Value. Data represent means  $\pm$  SEM. \*\*\*\*P $\leq$  0.0001, #P $\leq$ 0.001, \*\*P $\leq$ 0.01, \*P $\leq$ 0.05.

# Figure-S12, related to Figure 3

## Supplementary Fig 12

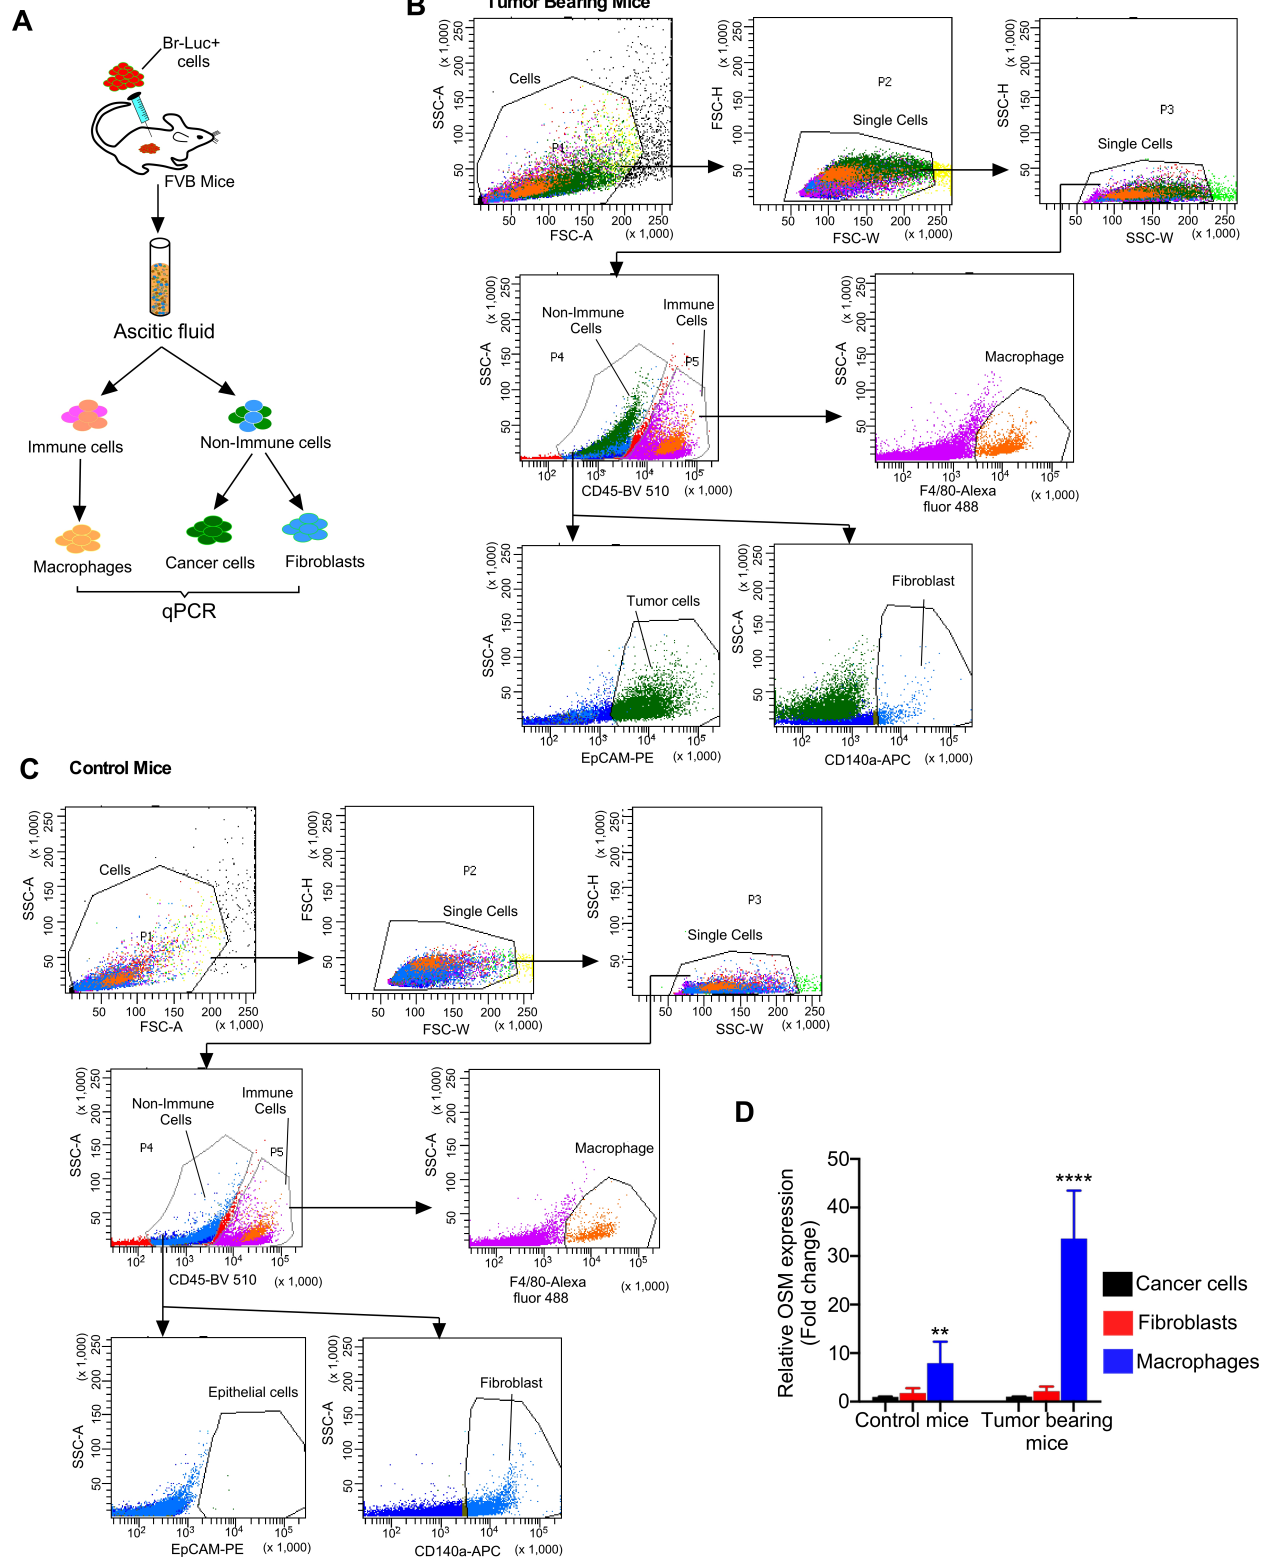

**Fig. S12. Peritoneal macrophages express high levels of OSM.** **A**, Schema shows the flow chart how macrophages, fibroblast and epithelial cells were collected from mice for qPCR. Single cell preparations were gated for respective markers as labelled. First, we sorted the CD45<sup>+</sup> immune cells and macrophages using Alexa Fluor 488 F4/80 labelled antibody, then CD140a<sup>+</sup> fibroblasts and EpCAM<sup>+</sup> tumor cells were sorted. **B-C**, macrophages, fibroblasts and tumor/epithelial cells from tumor bearing mice (B) and non-tumor bearing control mice (C) were collected from ascitic fluid or peritoneal wash respectively. **D**, Total RNA was prepared from the indicated cells and qPCR was performed to determine the mRNA levels of OSM in each population. One-way ANOVA was performed. Data represent means  $\pm$  SEM. \*\*\*\* $P \leq 0.0001$ , \*\* $P \leq 0.01$

Figure-S13, related to Figure 4.

Supplementary Fig 13

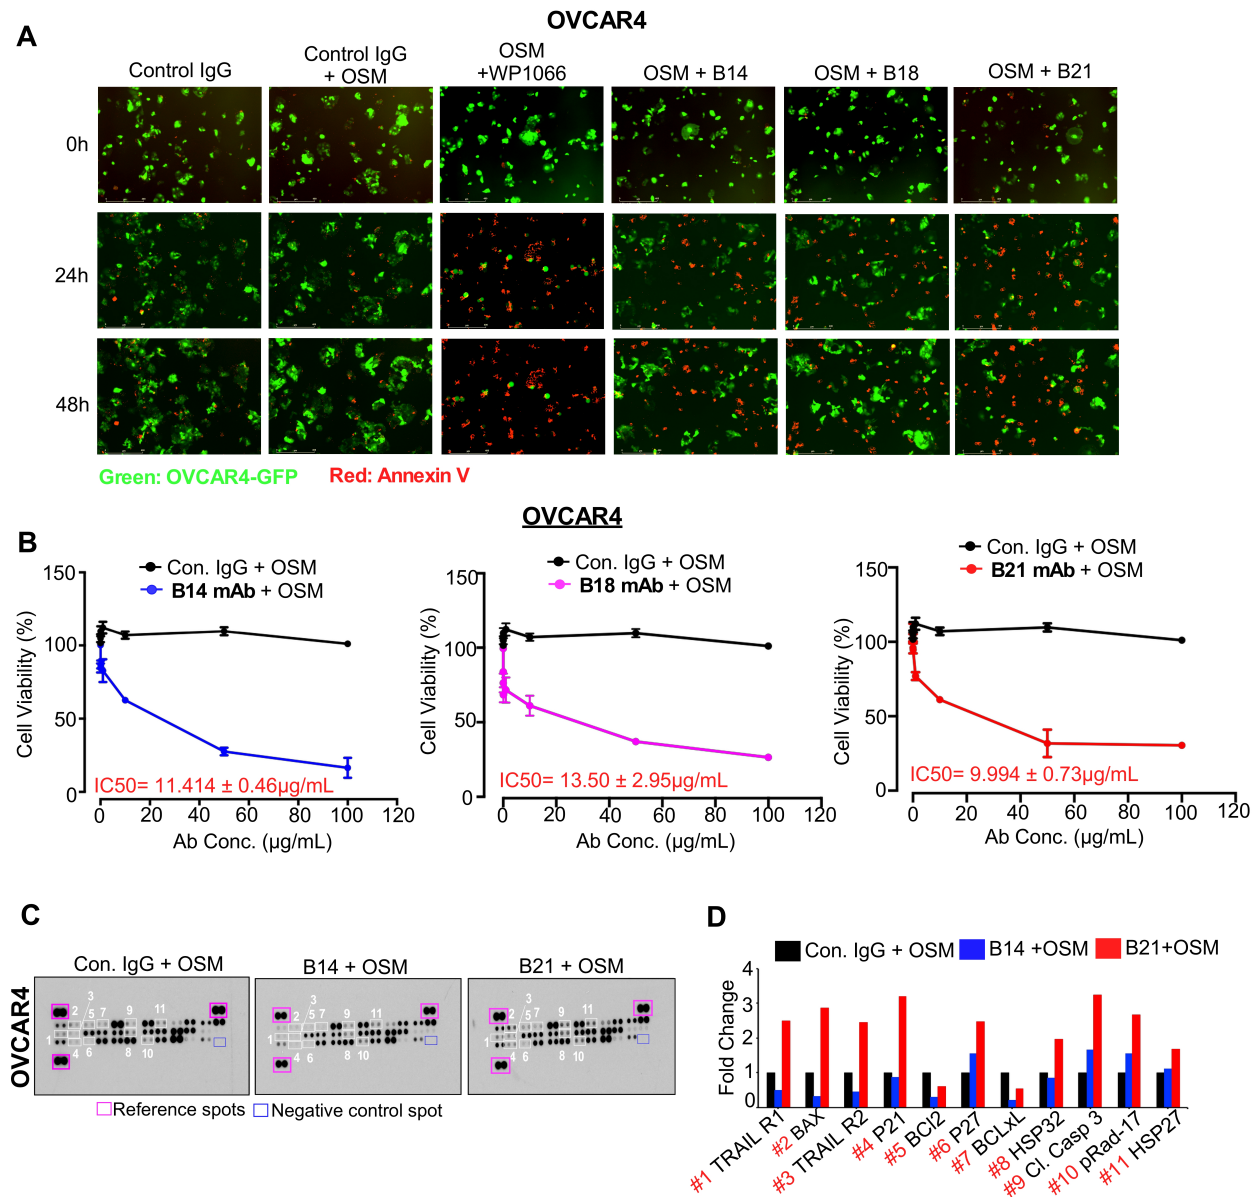

**Fig. S13. OSMR monoclonal antibodies abrogate OSM mediated ovarian cancer cell proliferation and induces apoptosis. A,** Representative phase contrast images of 'Fig- 4b' showing OVCAR4-GFP+ cells (green; viable cells) and Annexin V Red+ cells (Red; apoptotic cells) per field using Incucyte Live cell analyzer for a period of 0-48h. Scale bar, 400µm. **B,** OVCAR4 cells were treated with indicated concentrations of top 3

selected anti-OSMR antibodies B14, B18 and B21 with OSM stimulation and cell viability was assessed by CCK8 cell viability assay after 48h of treatment and IC50 of antibodies were calculated using GraphPad software. **C**, Human Apoptosis Protein array membrane shows the levels of proteins associated with cell death and are altered upon the treatment of B14 and B21 anti-OSMR antibodies in the presence of OSM for 48h in OVCAR-4 cells. **D**, Histogram shows the mean densitometry readings of the proteins marked by white squares on array membrane. Student's t test (two tailed, unpaired) was performed. Data represent means  $\pm$  SEM.

Figure-S14, related to Figure 4.

Supplementary Fig 14

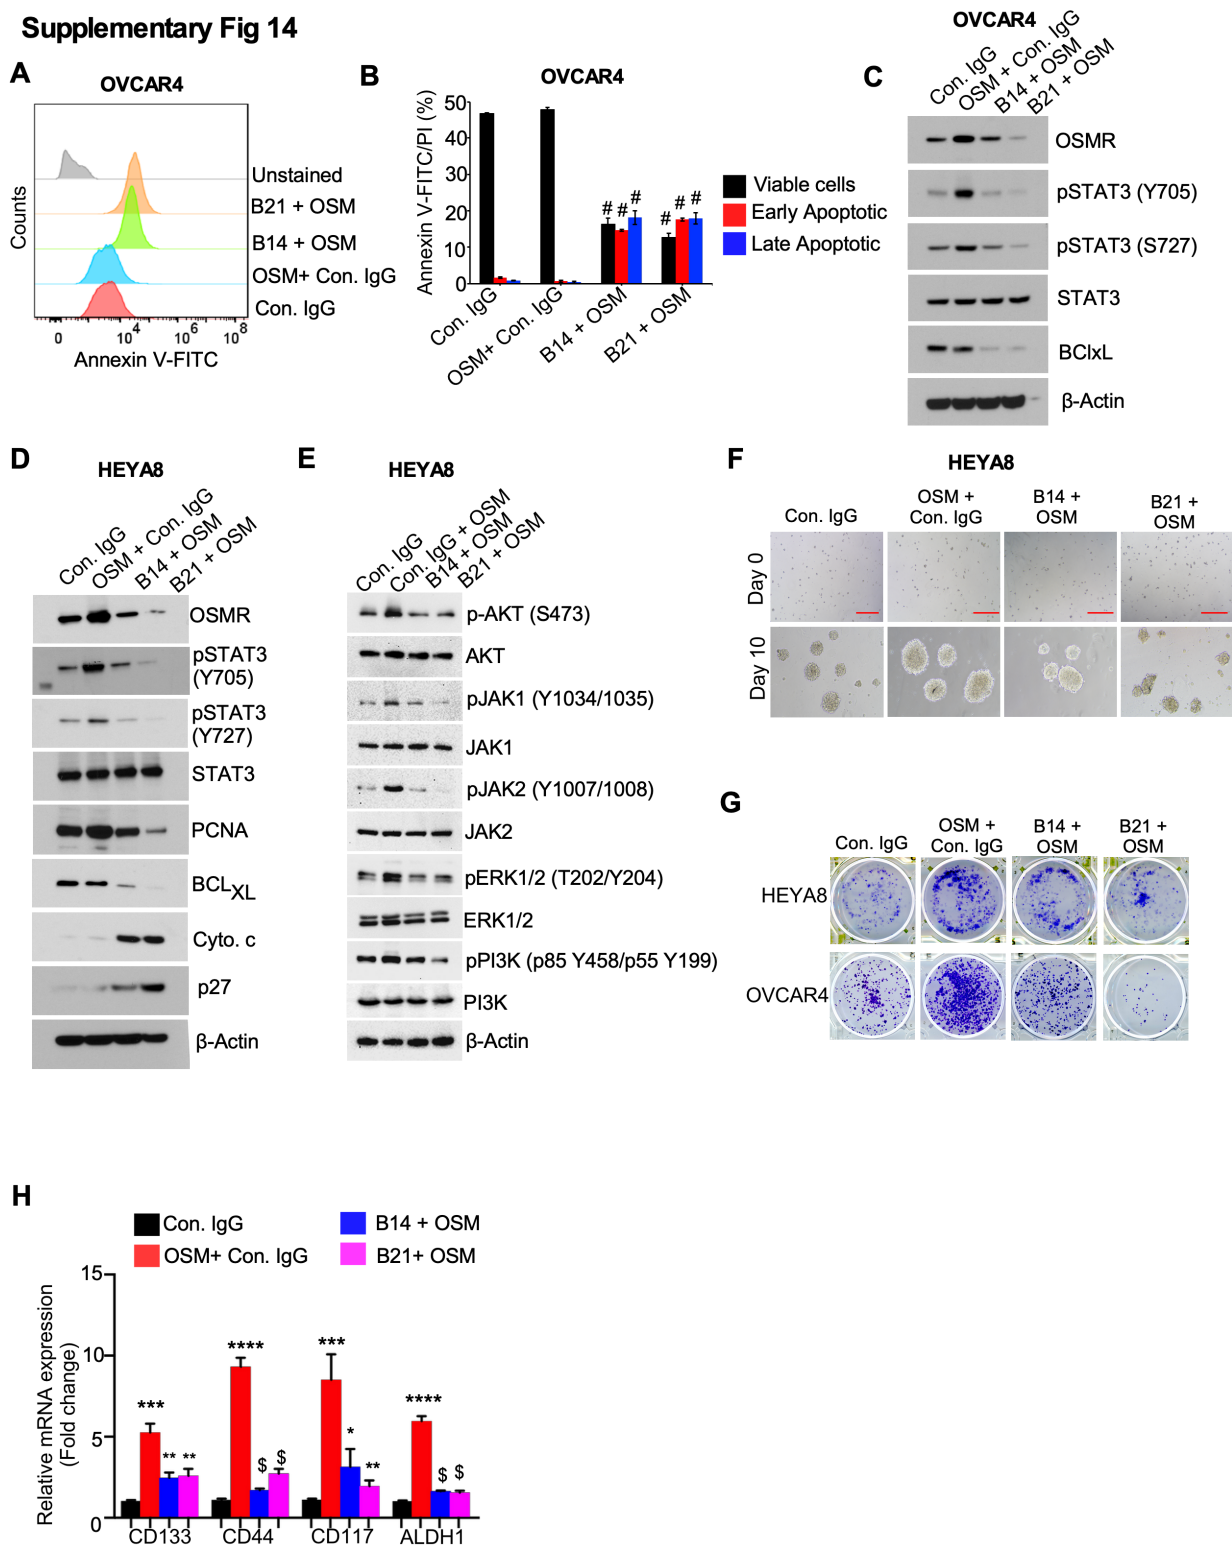

**Fig. S14. Anti-OSMR antibodies inhibit oncogenic signaling in ovarian cancer cells.**

**A**, Annexin V-FITC/PI apoptosis detection by Flow cytometry in HEYA8 cells pre-treated with B14 or B21 monoclonal antibodies for 4h, then stimulated with OSM (100ng/mL) for 16 h. **B**, Histogram represent the viable (Annexin V-FITC negative and PI negative), early (Annexin V-FITC positive and PI negative) and late apoptotic cells (Annexin V-FITC positive and PI positive). **C-E**, OVCAR4 and HEYA8 cells were treated with B14 (10ug/mL) and B21 (10ug/mL) monoclonal antibodies for 4h followed by stimulation of OSM (100ng/mL) for 48h. Cell lysates were then collected, and western blot was performed for the indicated proteins. **F**, Representative images of 3D spheroid formation assay. HEYA8 cells were treated with B14 and B21 (10ug/mL each) anti-OSMR antibodies for 4h followed by stimulation of OSM (100ng/mL). The spheroids were photographed for indicated days. Scale bar, 500  $\mu$ m. **G**, Representative images of colony formation assay in HEYA8 and OVCAR4 cells treated with B14 and B21 anti-OSMR antibodies in presence of OSM (100ng/mL) for 10 days. **H**, HEYA8 cells were treated with B14 (10ug/mL) and B21 (10ug/mL) monoclonal antibodies for 4h followed by stimulation of OSM (100ng/mL) for 24h. RNA was isolated, and qPCR was performed for the indicated genes. Student's t test (two tailed, unpaired) was performed in (B and H). Data represent means  $\pm$  SEM. #P $\leq$  0.0001, \$P $\leq$  0.0001, \*\*\*\*P $\leq$  0.0001, \*\*\*P $\leq$ 0.001, \*\*P $\leq$ 0.01, \*P $\leq$ 0.05.

Figure-S15, related to Figure 4 and 5

Supplementary 15

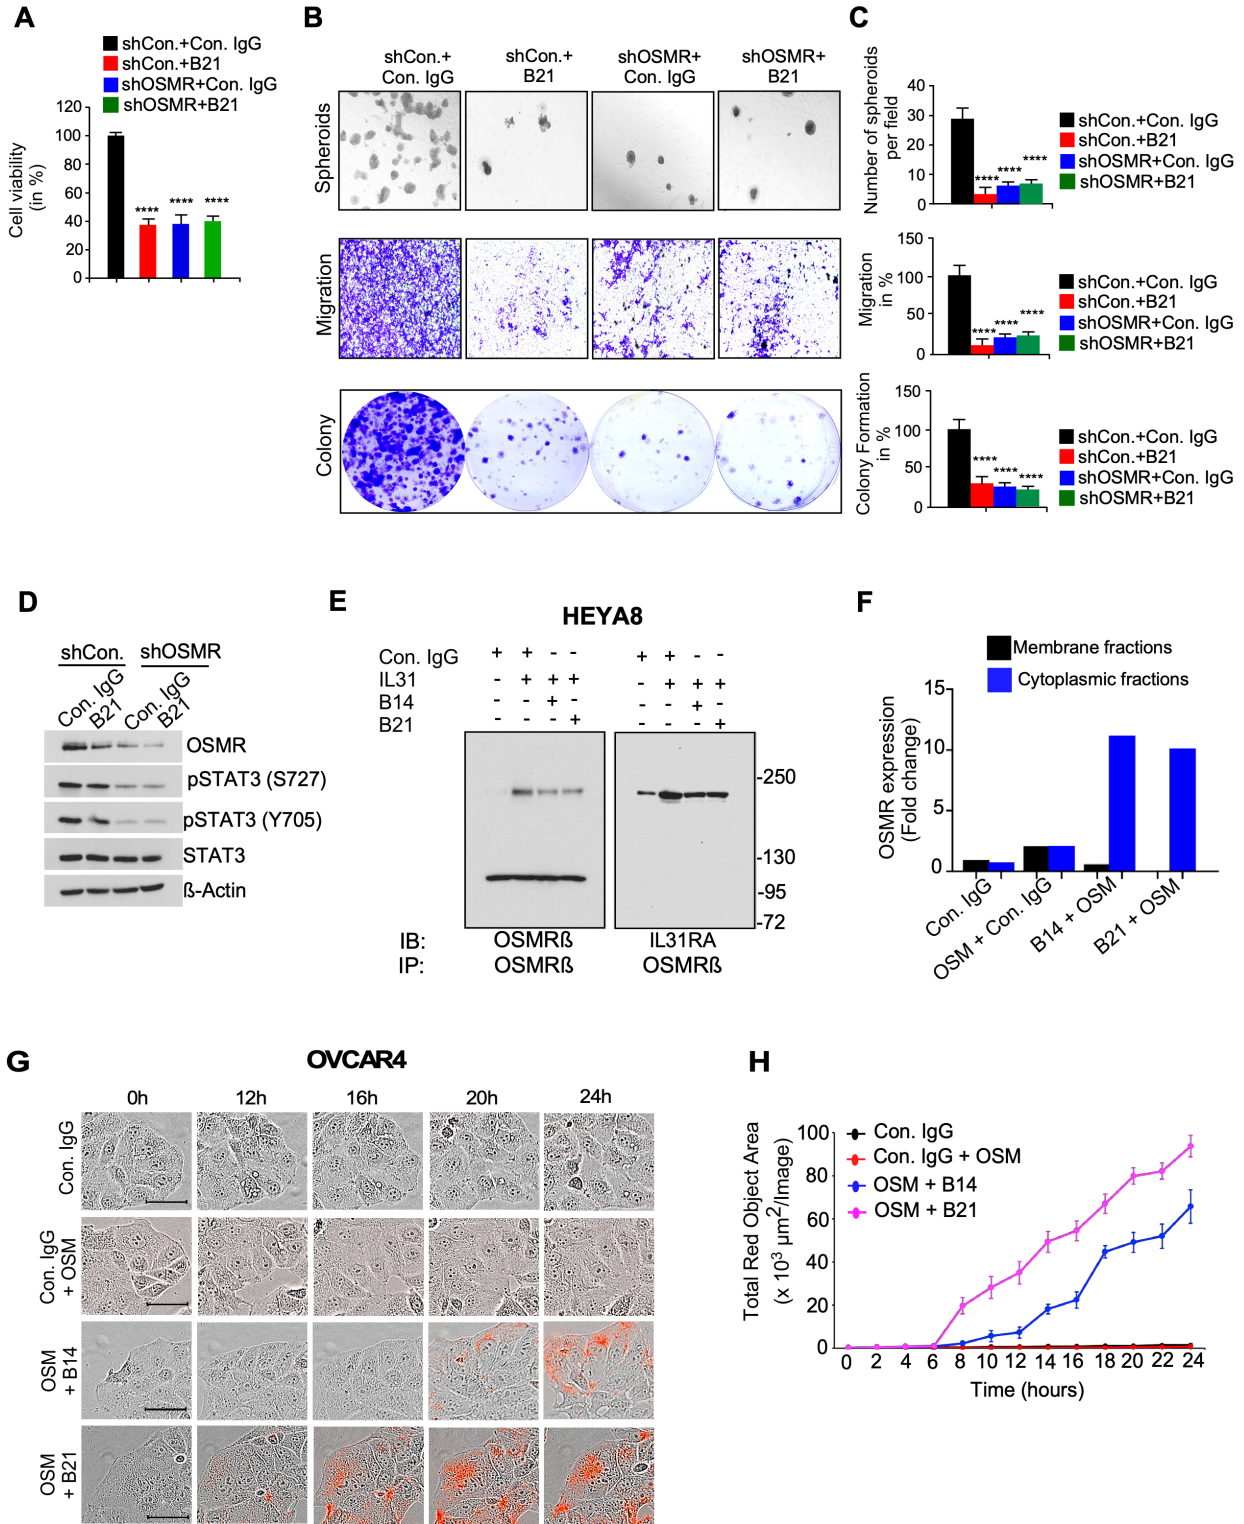



**Fig. S15. Anti-OSMR antibodies were not able to induce any anti-proliferative or anti-migratory effects in OSMR-depleted cancer cells. A-D,** HEYA8 cells stably knocked down of OSMR using shOSMR#1-lentiviral vector or control vectors were stimulated with B21 and control IgG antibodies (10 mg/mL each) for 48h. **A,** Cell viability was determined using CCK8 cell viability assay reagent after 48h. **B,** Representative images of 3D spheroid formation assay of stable HEYA8 cells prepared in (A) were cultured in ClonaCell media on low adherent plate in the presence of control IgG or B21 antibodies for 10 days (upper panel); scale bar, 500  $\mu$ m. Representative images of transwell migration of HEYA8 cells in (A) were treated with control IgG and B21 antibodies for 12 h. Scale bar, 100  $\mu$ m. Crystal violet staining was used to visualize the migrated cells (upper panel). Both control or OSMR-depleted HEYA8 cells (1200) were grown on 6-well culture plate with control IgG and B21 antibodies for 14 days. Colonies formed were stained using 0.5% crystal violet and imaged. **C,** (upper panel) Histogram represents the size of spheroids from 4 different fields per group on Day 10 of spheroid culture (lower panel). (middle panel) Histograms represents percentage of migrated cells from 3 different fields per group (lower panel). (lower panel) Histogram represents number of colonies formed in percentage with respect to shcontrol-HEYA8 cells treated with control IgG. **D,** Cell lysates were prepared from HEYA8 cells stably transfected with shControl and shOSMR and treated with control IgG and B21 antibodies and then western blot was performed for the indicated proteins. **E,** Dimerization assay performed in HEYA8 cells pre-treated with B14 or B21 mAbs for 4h, then stimulated with IL31 (100ng/mL) for 1h. Cell lysates were prepared after crosslinking with BS3 reagent and immunoprecipitated (IP) using anti-IL31RA or anti-OSMR antibody, then resolved on SDS/PAGE. Dimers and monomers (arrows) were detected using anti-OSMR and anti-IL31RA antibodies by immunoblot (IB). **F,** Histograms represent the protein levels of the indicated proteins in membrane and cytoplasmic fractions that were normalized to protein levels of Na, K-ATPase and LAMP1 from membrane and cytosolic fractions respectively as in Fig. 5D. **G,** Control IgG or B14 or B21 mAbs were labeled with Incucyte® Human FabFluor-pH Red Antibody Labeling Reagent and then added to OVCAR4 cells along with OSM (100 ng/mL) and incubated for 24h. Red fluorogenic signals released due to the low-acidic pH when the FabFluor-labelled anti-OSMR antibody internalized to lysosomes were quantitated. Time lapse imaging were performed to detect the fluorescence. Scale bar, 50 $\mu$ m. **H,**

Quantitative assessment of internalized OSMR antibody complex based on the total red dot area per image as evaluated using Incucyte S3 software. Data represent means  $\pm$  SEM. Student's t test (two tailed, unpaired) and Dunnett's multiple comparison tests were performed to determine P-Value. \*\*\*\*P<0.0001

**Figure-S16, related to Figure 6.**

**Supplementary Fig 16**

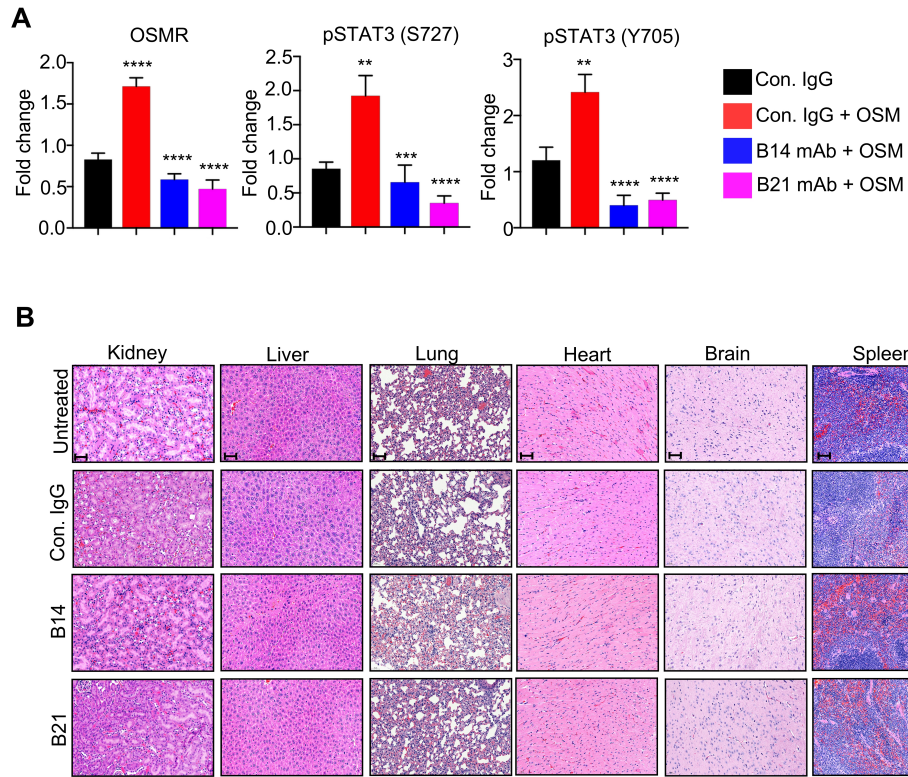

**Fig. S16. Anti-OSMR antibodies reduced the incidence of tumor occurrence and metastasis of Ovarian cancer. A,** Athymic nude mice were injected with HEYA8-Luc+ cells intraperitoneally. Mice were treated with OSM (250 ng/kg body weight) 30 min after the injections of control IgG, B14, B21, antibodies (10mg/kg body weight) intraperitoneally for 5 weeks (N=7/ group). Western blots were performed in triplicate using tissues from three representative mice from each group as in Fig. 6I and densitometric analysis was performed to determine the levels of indicated protein normalized to  $\beta$ -Actin in each group. **B,** Athymic nude mice (n=4) were injected with Control IgG, B14 and B21 mAbs (10mg/kg body weight each) for 5 weeks. Mice were sacrificed on 7<sup>th</sup> week and organs were collected, then H&E staining was performed from the sections of indicated organs

collected. Scale 50  $\mu\text{m}$ . Data represent means  $\pm$  SEM. Student's t test and Dunnett's multiple comparison test were performed. \*\*\*\* $P \leq 0.0001$ , \*\*\* $P \leq 0.001$ , \*\* $P \leq 0.01$ , \* $P \leq 0.05$

### **Legend to Supplementary Material-1**

Heatmap shows all the known ligand-receptor interactions between different cell types identified by CellPhoneDB in the OvD5-SS2 dataset.

**Supplementary Table S1: Patient characteristics of the TMA cohort.**

| <b>TMA data set Characteristics</b>         | <b>Summary</b>     |
|---------------------------------------------|--------------------|
| Ovarian carcinoma patients                  | N=110              |
| Age                                         | 48.27 ± 1.31 years |
| Gender                                      | Female             |
| Number of tumor histopathology image series | N=110              |
| Number of histopathology image cores        | N=150              |
| Number of NAT cores                         | N=20               |
| Number of Normal Ovarian tissue cores       | N=10               |
| Number of Metastatic tissue cores           | N=10 (8%)          |
| Number of Borderline tissue cores           | N=7 (5.6%)         |
| Number of Benign tissue cores               | N=18 (14.4%)       |
| <b>Grade</b>                                |                    |
| Grade 1                                     | N=6 (5.45%)        |
| Grade 2                                     | N=23 (21%)         |
| Grade 1-2                                   | N=3 (2.72%)        |
| Grade 3                                     | N=20 (18.18%)      |
| <b>TMA data set Characteristics</b>         | <b>Summary</b>     |
| Grade 4                                     | N=0                |
| Grade unavailable                           | N=58 (52.72%)      |
| High Grade serous Ovarian carcinoma         | N=23 (20.9%)       |
| Low Grade serous Ovarian carcinoma          | N=4 (3.64%)        |
| <b>Stage</b>                                |                    |
| Stage I                                     | N=29 (26.36%)      |
| Stage II                                    | N=26 (23.64%)      |
| Stage III                                   | N=24 (21.82%)      |

**Supplementary Table S2: List of qPCR primers**

| <b>Genes</b> | <b>Species</b> | <b>Direction</b> | <b>Sequence (5'→3')</b>        |
|--------------|----------------|------------------|--------------------------------|
| OSMR         | Human          | Forward          | CGC AGC AAG ACG GGA AAT TG     |
| OSMR         | Human          | Reverse          | GGG CGG GAG TTA CTG GAA AA     |
| Osm          | Mouse          | Forward          | CAG AAT CAG GCG AAC CTC ACG    |
| Osm          | Mouse          | Reverse          | AGC TCT CAG GTC AGG TGT GTT    |
| IL31RA       | Human          | Forward          | ACG TAC AAC CTC ACG GGG CT     |
| IL31RA       | Human          | Reverse          | TGG CCT TCT TCC ATC CGC CT     |
| IL6ST        | Human          | Forward          | TGT GAG TGG GAT GGT GGA AGG G  |
| IL6ST        | Human          | Reverse          | AGT GCA TGA GGT GGG GGT GT     |
| STAT3        | Human          | Forward          | GGA GGA GTT GCA GCA AAA AG     |
| STAT3        | Human          | Reverse          | TGT GTT TGT GCC CAG AAT GT     |
| IL6RA        | Human          | Forward          | CCA TGC AGG CAC TTA CTA CT     |
| IL6RA        | Human          | Reverse          | GGC AGT GGT ACT GAA GAA GAA    |
| IL11RA       | Human          | Forward          | CCG GAT TAA TGT GAC TGA GGT G  |
| IL11RA       | Human          | Reverse          | GGG TAA CCT GGT ACT GAC TCT A  |
| LIFR         | Human          | Forward          | CAT CAT CAG CGT AGT GGC TAA A  |
| LIFR         | Human          | Reverse          | GTA ATG CCA GGT GAG GAG AAT C  |
| CNTFR        | Human          | Forward          | CAG CAC ACA CCA TCA CAG A      |
| CNTFR        | Human          | Reverse          | GTC ACT CCA TGT CCC AAT CTC    |
| IL27RA       | Human          | Forward          | CTG TGG GTG ACA GCA TCT AC     |
| IL27RA       | Human          | Reverse          | CTT TCC ACC TCA GGG TGT TAT C  |
| ACTB         | Human          | Forward          | GTC ATT CCA AAT ATG AGA TGC GT |
| ACTB         | Human          | Reverse          | GCT ATC ACC TCC CCT GTG TG     |
| Actb         | Mouse          | Forward          | GGC TGT ATT CCC CTC CAT CG     |
| Actb         | Mouse          | Reverse          | CCA GTT GGT AAC AAT GCC ATG T  |

**Supplementary Table S3: Sequences of siRNAs used for transfections**

| <b>Gene</b> | <b>Sequence</b>                          |
|-------------|------------------------------------------|
| OSMR        | siRNA#1: 5'-GUA ACU GCA UUC AAC UUG A-3' |
| OSMR        | siRNA#2: 5'-CCA GAU CAG UAG GAU UGA A-3' |
| IL6ST       | 5'-CCU CAU GCA CUG UUG AUU A-3'          |
| LIFR        | 5'-CCA CCU UCC AAA AUA GCG A-3'          |
| IL31RA      | 5'-CAA UGA ACA CUA CUA ACC A-3'          |
| IL6R        | 5'-CCA GUA GUG UCG GGA GCA A-3'          |
| CNTFR       | 5'-GCC ACA AUG CCA CAG CUA U-3'          |
| IL27RA      | 5'-GAG UUG GAC CCU UGG GCG A-3'          |
| IL11RA      | 5'-CUG AGU UCU GGA GCC AGU A-3'          |

**Supplementary Table S4: Catalogue Numbers of Plasmids**

| <b>Plasmids</b>                                    | <b>Catalogue No.</b>                                     | <b>Sequence</b>                                                                                 | <b>Species</b> | <b>Company</b>   |
|----------------------------------------------------|----------------------------------------------------------|-------------------------------------------------------------------------------------------------|----------------|------------------|
| MISSION®<br>pLKO.1-<br>shOSMR #1                   | TRCN0000058687,<br>Clone ID:<br>NM_003999.1-<br>2459s1c1 | 5'-CCG GGC ATT GAT<br>TGT GGA CAA CCT<br>ACT CGA GTA GGT<br>TGT CCA CAA TCA ATG<br>CTT TTT G-3' | Human          | Sigma<br>Aldrich |
| MISSION®<br>pLKO.1-puro-<br>shOSMR #2              | TRCN0000289933<br>Clone ID:<br>NM_003999.1-<br>2857s21c1 | 5'-CCG GCG AGT TGA<br>CTA AGC CTA ACT ACT<br>CGA GTA GTT AGG<br>CTT AGT CAA CTC GTT<br>TTT G-3' | Human          | Sigma<br>Aldrich |
| MISSION®<br>pLKO.1-puro-<br>shOsmr                 | TRCN0000339541<br>Clone ID:<br>NM_011019                 | 5'- TTG GAA CTG GAC<br>GTC TGA TAT-3'                                                           | Mouse          | Sigma<br>Aldrich |
| MISSION®<br>pLKO.1-puro<br>Empty Vector<br>control | SHC001V                                                  |                                                                                                 | Human          | Sigma<br>Aldrich |
| pUNO1-<br>OSMR                                     | #puno1-hosmr                                             |                                                                                                 | Human          | InvivoGen        |
| pUNO1-<br>Control                                  | #puno1-mcs                                               |                                                                                                 | Human          | InvivoGen        |



**Supplementary Table S5: Acute toxicity (athymic nude mice) Clinical biochemistry**

| Parameters                           | Liver function |              |               | Kidney function |             | Others      |              |
|--------------------------------------|----------------|--------------|---------------|-----------------|-------------|-------------|--------------|
|                                      | AST            | ALT          | ALP           | TBIL            | Albumin     | TP          | BW           |
| Group                                | U/L            | U/L          | U/L           | mg/dL           | g/dL        | g/dL        | gm           |
| <i>Normal Range</i> <sup>(1,2)</sup> | 52-560         | 26-120       | 50-96         | 0.0-0.9         | 2.5-4.0     | 4.3-6.4     | 20-28        |
| Untreated                            | 44.28 ± 3.25   | 19.86 ± 1.97 | 91.143 ± 9.54 | 0.14 ± 0.02     | 2.63 ± 0.23 | 4.26 ± 0.40 | 23.21 ± 0.40 |
| Control IgG                          | 327.43 ± 58.46 | 32.57 ± 3.05 | 94 ± 9.58     | 0.23 ± 0.02     | 2.77 ± 0.16 | 4.5 ± 0.3   | 23.26 ± 0.28 |
| B14 mAb                              | 294.14 ± 57.65 | 37 ± 3.84    | 87.28 ± 9.61  | 0.2 ± 0.0       | 2.8 ± 0.16  | 4.51 ± 0.25 | 22.65 ± 0.67 |
| B21 mAb                              | 305 ± 70.81    | 31.14 ± 3.38 | 85 ± 12.63    | 0.21 ± 0.01     | 2.63 ± 0.16 | 4.21 ± 0.28 | 23.09 ± 0.28 |

Aspartate Aminotransferase (AST); Alanine Aminotransferase (ALT); Alkaline Phosphatase (ALP); Total Bilirubin (TBIL); Total Protein (TP); Body weight (BW)

**Supplementary Table S6. Catalogue numbers and available Research Resource Identifier (RRID) number of reagents and software**

**KEY RESOURCES TABLE**

| REAGENT or RESOURCE         | SOURCE                    | IDENTIFIER                           |
|-----------------------------|---------------------------|--------------------------------------|
| Antibodies                  |                           |                                      |
| Anti-OSMR $\beta$           | Proteintech               | Cat# 10982-1-AP;<br>RRID: AB_2156583 |
| Anti-OSMR                   | Sino Biologicals          | Cat: 11226-RP02                      |
| Anti-LIFR                   | R&D Systems               | Cat #AF-249-NA;<br>RRID: AB_354420   |
| anti-IL31RA                 | Thermo Fisher Scientific  | Cat# PA5-47391;<br>RRID: AB_2606511  |
| anti-IL6ST (anti-gp130)     | Santa Cruz Biotechnology  | Cat# sc-376280;<br>RRID: AB_10986409 |
| pSTAT3 (S727) antibody      | Cell Signaling Technology | Cat# 9134;<br>RRID: AB_331589)       |
| pSTAT3 (Y705) antibody      | Cell Signaling Technology | Cat# 9145;<br>RRID: AB_2491009       |
| STAT3 antibody              | Cell Signaling Technology | Cat# 9139; RRID: AB_331757           |
| pJAK1 (Y1034/1035) antibody | Cell Signaling Technology | Cat# 74129;<br>RRID: AB_2799851      |
| JAK1 antibody               | Cell Signaling Technology | Cat# 3344;<br>RRID: AB_2265054       |
| pJAK2 (Y1008) antibody      | Cell Signaling Technology | Cat# 8082.<br>RRID: AB_10949104      |
| JAK2 antibody               | Cell Signaling Technology | Cat# 74987.<br>RRID: AB_2799862      |

|                                                             |                               |                                   |
|-------------------------------------------------------------|-------------------------------|-----------------------------------|
| Anti- $\beta$ -Actin                                        | Santa Cruz<br>Biotechnology   | Cat #sc 8432.<br>RRID: AB_626630  |
| Ki-67 antibody                                              | Cell Signaling<br>Technology  | Cat #9027,<br>RRID: AB_2636984    |
| Anti-PCNA                                                   | Santa Cruz<br>Biotechnology   | Cat #sc-25280.<br>RRID: AB_628109 |
| BCL <sub>xL</sub> antibody                                  | Cell Signaling<br>Technology, | Cat #2764.<br>RRID: AB_2228008    |
| BCL2 antibody                                               | Cell Signaling<br>Technology  | Cat #15071.<br>RRID: AB_2744528   |
| Cytochrome c antibody                                       | Cell Signaling<br>Technology  | Cat #11940.<br>RRID: AB_2637071   |
| p27 Kip1 antibody                                           | Cell Signaling<br>Technology  | Cat #3686.<br>RRID: AB_2077850    |
| LAMP1 antibody                                              | Cell Signaling<br>Technology  | Cat #15665.<br>RRID: AB_2798750   |
| Na,K-ATPase antibody                                        | Cell Signaling<br>Technology  | Cat # #3010.<br>RRID: AB_2060983  |
| Anti-alpha 3 Sodium<br>Potassium ATPase/ATP1A3<br>Antibody  | Santa Cruz<br>Biotechnology   | Cat #sc-376967                    |
| Phospho-Akt (Ser473)<br>antibody                            | Cell Signaling<br>Technology  | Cat #4058; RRID: AB_331168        |
| Phospho-p44/42 MAPK<br>(Erk1/2) (Thr202/Tyr204)<br>antibody | Cell Signaling<br>Technology  | Cat #4376; RRID: AB_331772        |
| p44/42 MAPK (Erk1/2)<br>Antibody                            | Cell Signaling<br>Technology  | Cat #9102; RRID: AB_330744        |
| Phospho-PI3 Kinase p85<br>(Tyr458)/p55 (Tyr199)<br>antibody | Cell Signaling<br>Technology  | Cat# 4228, RRID: AB_659940        |

|                                                               |                              |                                       |
|---------------------------------------------------------------|------------------------------|---------------------------------------|
| PI3 Kinase p85 antibody                                       | Cell Signaling<br>Technology | Cat #4257; RRID: AB_659889            |
| Akt (pan) antibody                                            | Cell Signaling<br>Technology | Cat #2920.<br>RRID: AB_1147620        |
| Cleaved caspase3                                              | Cell Signaling<br>Technology | Cat #9661,<br>RRID: AB_2341188        |
| Anti-rabbit IgG, HRP-linked<br>Antibody                       | Cell Signaling<br>Technology | Cat # 7074,<br>RRID: AB_2099233       |
| Anti-mouse IgG, HRP-linked<br>Antibody                        | Cell Signaling<br>Technology | Cat # 7076, RRID:<br>AB_330924        |
| Brilliant Violet 510™ anti-<br>mouse CD45 Antibody            | BioLegend                    | Cat #103137.<br>RRID: AB_2561392      |
| APC anti-mouse CD140a<br>Antibody                             | BioLegend                    | Cat #135908.<br>RRID: AB_2043970      |
| Alexa Fluor® 488 anti-mouse<br>F4/80 Antibody                 | BioLegend                    | Cat #123120.<br>RRID: AB_893479       |
| CD326 (EpCAM) Monoclonal<br>Antibody (G8.8), PE,              | eBioscience                  | Cat #12-5791-82.<br>RRID: AB_953615   |
| IRDye® 680RD Donkey anti-<br>Rabbit IgG Secondary<br>Antibody | Li-Cor                       | Cat # 926-68073.<br>RRID: AB_10954442 |
| IRDye® 800CW Goat anti-<br>Mouse IgG Secondary<br>Antibody    | Li-Cor                       | Cat #926-32210.<br>RRID: AB_621842    |
| <b>Chemicals, Peptides, and<br/>Recombinant Proteins</b>      |                              |                                       |
| DMEM                                                          | Sigma Aldrich                | Cat # D0819                           |
| MCDB 105                                                      | Sigma Aldrich                | Cat # M6395                           |
| Medium 199                                                    | Sigma Aldrich                | Cat # M4530                           |
| RPMI-1640                                                     | Sigma Aldrich                | Cat #R8758                            |

|                                                                                   |                                     |               |
|-----------------------------------------------------------------------------------|-------------------------------------|---------------|
| MEGM™ Mammary Epithelial Cell Growth Medium                                       | Lonza                               | Cat #CC-3150  |
| Eagle's Minimum Essential Medium with Earle's salts and non-essential amino acids | Sigma Aldrich                       | Cat #56416C   |
| ClonaCell™-TCS Medium                                                             | Stem Cell Technologies              | Cat #03814    |
| HBSS                                                                              | Thermo Fisher Scientific            | Cat# 14060040 |
| Recombinant EGF                                                                   | Peprotech                           | AF-100-15     |
| FBS (heat inactivated)                                                            | Atlanta Biologicals                 | Cat# H17112   |
| FBS (non-heat inactivated)                                                        | ATCC                                | Cat # 30-2020 |
| Antibiotic (Penicillin/Streptomycin)                                              | Thermo Fisher Scientific            | Cat #15140122 |
| DMSO                                                                              | Sigma Aldrich                       | Cat #D8418    |
| Hydrocortisone                                                                    | Sigma Aldrich                       | Cat #H0135    |
| Bovine insulin                                                                    | Sigma Aldrich                       | Cat #I0516    |
| 2-mercaptoethanol                                                                 | Sigma Aldrich                       | Cat #M3148    |
| Bovine pituitary extract                                                          | Life Technologies                   | Cat #13028014 |
| Lipofectamine 2000                                                                | Invitrogen-Thermo Fisher Scientific | Cat #11668027 |
|                                                                                   |                                     |               |
| RNAiMax Transfection Reagent                                                      | Thermo Fisher Scientific            | Cat #13778030 |
| Cell Counting Kit-8 (CCK-8)                                                       | Dojindo, Japan                      | Cat #CK04-05  |
| IncuCyte® Annexin V Red Reagent                                                   | Sartorius (Essen Bioscience)        | Cat #4641     |
| FabFluor (Red) reagent                                                            | Essen Bioscience                    | Cat #4722     |
| Glutaraldehyde                                                                    | Sigma Aldrich                       | Cat #G7651    |
| Crystal Violet                                                                    | Sigma Aldrich                       | Cat #C6158    |
| Acetic acid                                                                       | Sigma Aldrich                       | Cat #A6283    |

|                                       |                          |                 |
|---------------------------------------|--------------------------|-----------------|
| Trypsin                               | Thermo Fisher Scientific | Cat# 15400054   |
| PBS                                   | Sigma Aldrich            | Cat# P5493      |
| RIPA buffer                           | Santa Cruz Biotechnology | Cat# sc-24948A  |
| Protein A/G Magnetic Beads            | Thermo Fisher Scientific | Cat# 88802      |
| Paraformaldehyde                      | Sigma Aldrich            | Cat# 158127     |
| Triton X 100                          | Sigma Aldrich            | Cat# T8787      |
| Glycine                               | Sigma Aldrich            | Cat# G8898      |
| Protease inhibitor cocktail           | Sigma Aldrich            | Cat# P8340      |
| Dynabeads™ Protein A                  | Invitrogen               | Cat# 10001D     |
| 10% Formalin fixative                 | VWR                      | Cat# 16004-121  |
| Tween 20                              | Bio-Rad                  | Cat# 1706531    |
| BSA                                   | Sigma Aldrich            | Cat# A7906      |
| Ampicillin                            | Sigma Aldrich            | Cat# A5354      |
| LB Agar                               | Sigma Aldrich            | Cat# L2897      |
| LB Broth (Lennox)                     | Sigma Aldrich            | Cat# L3022      |
| Hematoxylin Solution, Harris Modified | Sigma Aldrich            | Cat# HHS32-1L   |
| IHC Antigen Retrieval solution        | IHC World                | Cat# IW-1100    |
|                                       |                          |                 |
| Recombinant Human OSM Protein         | Sino Biological          | Cat# 10452-HNAH |
| Recombinant Human IL31 Protein        | R & D Systems            | Cat# 2824-IL    |
| Recombinant Human LIF Protein         | R & D Systems            | Cat# 7734-LF    |
| Recombinant Human OSMR                | Sino Biologicals,        | Cat# 11226-H08H |
| Trypan Blue                           | Sigma Aldrich            | Cat# T8154      |
| D-luciferin                           | Goldbio                  | Cat# LUCK-1G    |

|                                                     |                          |                |
|-----------------------------------------------------|--------------------------|----------------|
| Polybrene Transfection Reagent                      | Millipore                | Cat# TR-1003   |
| Puromycin                                           | Thermo Fisher Scientific | Cat # A1113803 |
| Blasticidin                                         | InvivoGen                | Cat #ant-bl-05 |
| Mitomycin C                                         | Sigma Aldrich            | Cat #M4287     |
| BS3                                                 | Thermo Fisher Scientific | Cat #21580     |
| <b>Critical Commercial Assay Kits</b>               |                          |                |
| MycoSensor PCR Assay kit                            | Agilent                  | Cat# 302109    |
| Pierce BCA Protein Assay kit                        | Thermo Fisher Scientific | Cat# 23227     |
| Mem-PER™ Plus Membrane Protein Extraction Kit       | Thermo Fisher Scientific | Cat # 89842    |
| RNeasy kit                                          | Qiagen                   | Cat# 74104     |
| iScript™ Reverse Transcription Supermix for RT-qPCR | Bio-Rad                  | Cat# 1708841   |
| iTaq Universal SYBR Green PCR Kit                   | Bio-Rad                  | Cat# 1725121   |
| FITC Annexin V/Dead Cell Apoptosis Kit              | BD Pharmingen            | Cat# 556547    |
| Proteome Profiler Human Apoptosis Array Kit         | R&D Systems              | Cat# ARY009    |
| Human Phospho-Kinase Antibody Array kit             | R&D Systems              | Ca # ARY003B   |
| Human OSM DuoSet ELISA                              | R & D Systems            | Cat# DY295     |
| Mouse OSM DuoSet ELISA                              | R & D Systems            | Cat# DY495-05  |

|                                                            |                                       |                                                |
|------------------------------------------------------------|---------------------------------------|------------------------------------------------|
| Formalin-Fixed Paraffin-Embedded (FFPE) tissue array cores | US Biomax Inc.                        | Cat #OV1005bt and OV1004                       |
| Vectastain ABC-AP Kit                                      | Vector Labs                           | Cat #AK-5000                                   |
| Vector Red Alkaline Phosphatase Substrate Kit I            | Vector Labs                           | Cat # SK-5100                                  |
| <b>Experimental Models: Cell Lines</b>                     |                                       |                                                |
| FTE187                                                     | MD Anderson Cancer Center             | N/A                                            |
| FTE188                                                     | MD Anderson Cancer Center             | N/A                                            |
| NIH-OVCAR3                                                 | ATCC/PBCF                             | Cat #300307/p690_NIH: OvcAR-3, RRID: CVCL_0465 |
| OVCAR4                                                     | National Cancer Institute (NCI)       | Cat# OVCAR-4, RRID: CVCL_1627                  |
| OVCAR5                                                     | National Cancer Institute (NCI)       | Cat# OVCAR-5, RRID: CVCL_1628                  |
| OVCAR8                                                     | National Cancer Institute (NCI)       | Cat# OVCAR-8, RRID: CVCL_1629                  |
| CaOV3                                                      | ATCC/PBCF                             |                                                |
| SKOV3                                                      | ATCC/PBCF                             | Cat# HTB-77, RRID: CVCL_0532                   |
| HEYA8                                                      | MD Anderson Cancer Center, Texas, USA | N/A                                            |
| MCAS                                                       | MD Anderson Cancer Center, Texas, USA | N/A                                            |
| THP1                                                       | ATCC                                  | Cat# TIB-202, RRID: CVCL_0006                  |



|                                                  |                                                       |                                 |
|--------------------------------------------------|-------------------------------------------------------|---------------------------------|
| HEK293-FT                                        | Thermo Fisher Scientific                              | Cat# R70007                     |
| BR-Luc                                           | University of California, Los Angeles, CA             | N/A                             |
| GM15859                                          | Coriell Institute for Medical Research, NJ, USA.      | Cat# GM15859, RRID: CVCL_F624   |
| RF24                                             | VU University Medical Center, Amsterdam, Netherlands. | N/A                             |
| <b>Biological Samples</b>                        |                                                       |                                 |
| Human ovarian cancer tissues                     | Medical College of Wisconsin                          | Protocol Number: PRO00033433    |
| Human ovarian surface epithelial (OSE) tissues   | Medical College of Wisconsin                          | Protocol Number: PRO00033433    |
| Human fallopian surface epithelial (FTE) tissues | Medical College of Wisconsin                          | Protocol Number: PRO00033433    |
| <b>Experimental Models: Organisms/Strains</b>    |                                                       |                                 |
| FVB/NJ - Homozygous mice                         | Charles River Laboratories                            | Cat #207                        |
| Athymic nude mice: CrTac: NCr-Foxn1nu            | Envigo                                                | Cat # Hsd: Athymic Nude-Foxn1nu |
| <b>Oligonucleotides</b>                          |                                                       |                                 |
| Primers for qPCR, see Table S4                   | Integrated DNA technologies                           | N/A                             |

| Software and Algorithms                            |                              |                                                                                                                       |
|----------------------------------------------------|------------------------------|-----------------------------------------------------------------------------------------------------------------------|
| GraphPad Prism 7                                   | GraphPad Software            | <a href="https://www.graphpad.com/scientific-software/prism/">https://www.graphpad.com/scientific-software/prism/</a> |
| FlowJo Software                                    | FlowJo                       | <a href="https://www.flowjo.com/">https://www.flowjo.com/</a>                                                         |
| qPCR software                                      | BioRad CFX Maestro           | Cat# 12004110                                                                                                         |
| Living Image Software (IVIS Imaging Systems) 4.7.3 | Perkin Elmer                 | <a href="https://www.perkinelmer.com">https://www.perkinelmer.com</a>                                                 |
| Image J:                                           | Image J                      | <a href="https://imagej.net/Coloc_2">https://imagej.net/Coloc_2</a>                                                   |
| Octet Software Version 10.0                        | ForteBio                     | <a href="https://www.fortebio.com">https://www.fortebio.com</a>                                                       |
| IncuCyte® S3 Software                              | Sartorius (Essen Bioscience) | <a href="https://www.essenbioscience.co">https://www.essenbioscience.co</a>                                           |

**CONTACT FOR REAGENT AND RESOURCE INFORMATION:** Further information and requests for resources and reagents should be directed to and will be fulfilled by the Lead Contact, Pradeep Chaluvally-Raghavan ([pchaluvally@mcw.edu](mailto:pchaluvally@mcw.edu))

## References:

1. Maranto C, Udhane V, Jia J, Verma R, Muller-Newen G, LaViolette PS, *et al.* Prospects for Clinical Development of Stat5 Inhibitor IST5-002: High Transcriptomic Specificity in Prostate Cancer and Low Toxicity In Vivo. *Cancers (Basel)* **2020**;12
2. Danneman P, Suckow MA, Brayton C, Suckow MA. *The laboratory mouse*. Boca Raton: Taylor & Francis; 2013. xvi, 234 p. p.
